# Supplementary material
Source: PubMed Central journal article supplement (PMC3930200)
Supplement: NIHMS551698-supplement-Supplement.pdf [file NIHMS551698-supplement-Supplement.pdf]

Miller AR, Hawkins NA, McCollom CE, Kearney JA  
Mapping genetic modifiers of survival in a mouse model of Dravet syndrome

### **Supplementary Data**

**Figure S1.** Generation and characterization of *Scn1a*<sup>+/-</sup> null mice.

**Supplementary Table S1.** Single point marker analysis in 129-N2 early lethal progeny.

**Supplementary Table S2.** Number of genes with significant differences by RNA-seq in *Dsm* 1.5 LOD support intervals.

**Supplementary Table S3.** Significant Differences in *Dsm* intervals by RNA-Seq.

**Supplementary Table S4.** Missense variants in *Dsm* intervals and the predicted impact on protein function.

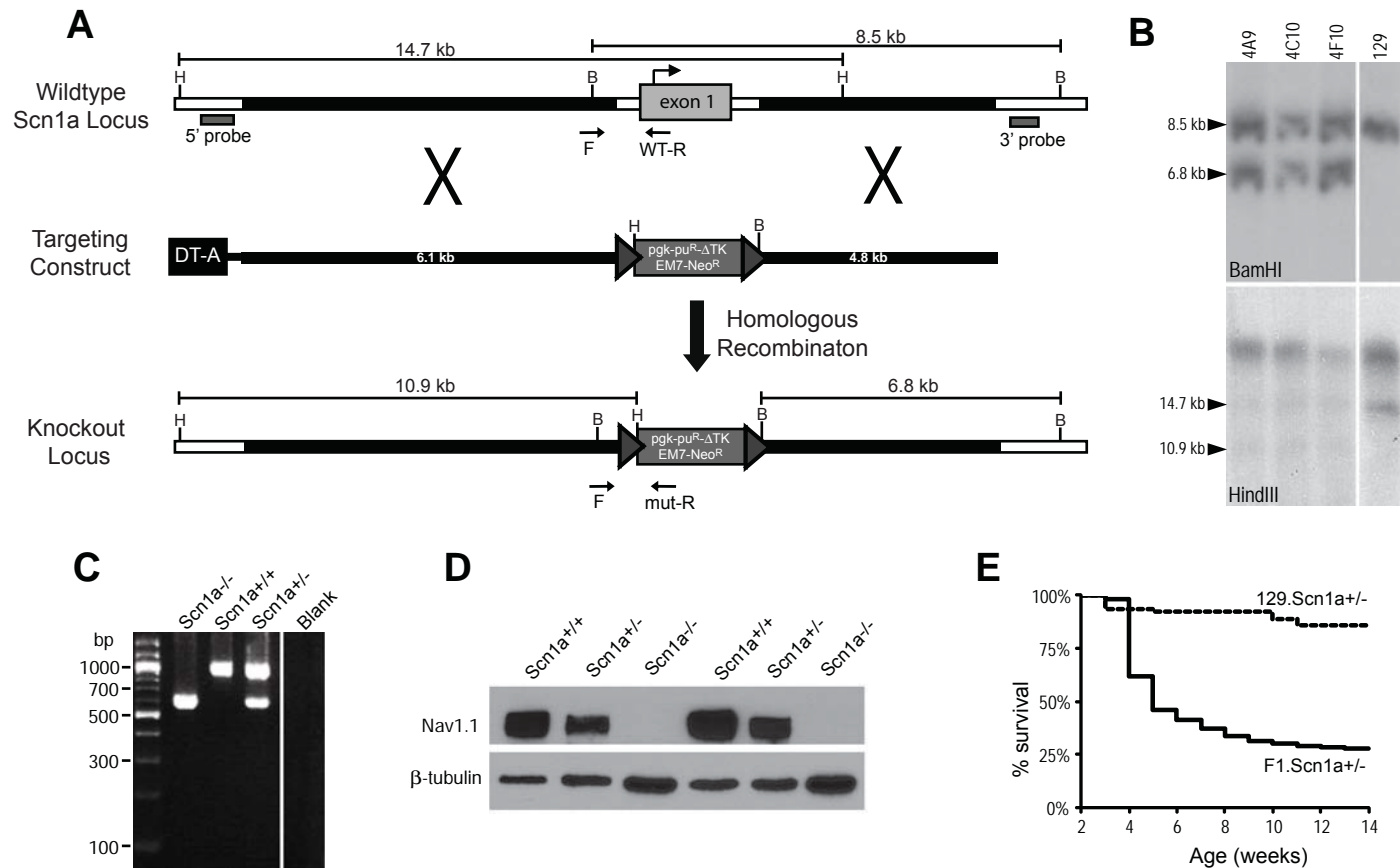

**Figure S1.** Generation and characterization of *Scn1a*<sup>+/-</sup> null mice. (A) Exon 1 containing the translation start site was replaced by a selection cassette by homologous recombination in ES cells. The targeting vector contained the pGK-puR- $\Delta$ tk-EM7-NeoR selection cassette flanked by lox sites (triangles), a 6.1 kb 5' homology arm and a 4.8 kb 3' homology arm. The diphtheria toxin cDNA (DT-A) cassette was located outside of the targeting arm for negative selection against random integrations. Arrows indicate primers for PCR genotyping of mice. Sizes of restriction fragments detected by Southern blot with 5' and 3' probes are indicated for the wild-type and recombinant locus. (B) Southern blot analysis of correctly targeted ES cell clones resulted in a predicted 10.9 kb fragment detected with the 5' probe in HindIII (H)-digested DNA and a predicted 6.8 kb fragment detected with the 3' probe in BamHI (B)-digested DNA. (C) Genotyping of offspring from intercrossing 129.Sc1a<sup>+/-</sup> heterozygotes using multiplex PCR with primers F, WT-R and mut-R results in amplification of 983 bp product from the wild-type allele and a 622 bp product from the knockout allele. (D) Immunoblotting of brain membrane proteins (50  $\mu$ g) with an Nav1.1 antibody (NeuroMab, clone K74/71) confirms the absence of Nav1.1 in *Scn1a*<sup>-/-</sup> null homozygotes and reduction of Nav1.1 protein in *Scn1a*<sup>+/-</sup> null heterozygotes compared to wildtype *Scn1a*<sup>+/+</sup> mice. Immunoblotting for  $\beta$ -tubulin (Sigma, clone TUB2.1) serves as a loading control. Two representative biological replicates are shown. (E) Survival of F1.Sc1a<sup>+/-</sup> mice (n=195) is significantly reduced compared to 129.Sc1a<sup>+/-</sup> mice (n=63) (Log-Rank (Mantel-Cox) p<0.0001).

**Supplementary Table S1.** Single point marker analysis in 129-N2 early lethal progeny. All mapping progeny were obligate *Scn1a*<sup>+/-</sup> heterozygotes and are expected to carry homozygous 129 alleles at the *Scn1a* locus on chromosome 2 (grey shading). Markers with a significant deviation from the expected Mendelian 1:1 ratio for a backcross are indicated by yellow shading ( $p < 0.05$ ).

| Chr | Marker       | Pos (Mb)* | $\chi^2$ value | p value |
|-----|--------------|-----------|----------------|---------|
| 1   | D1Mit211     | 25.5      | 0.000          | 1.000   |
| 1   | D1Mit303     | 62.9      | 1.500          | 0.221   |
| 1   | D1Mit424     | 160.8     | 0.667          | 0.414   |
| 1   | D1Mit206     | 173.0     | 1.500          | 0.221   |
| 2   | D2Mit1       | 3.9       | 0.000          | 1.000   |
| 2   | D2Mit372     | 36.1      | 8.067          | 0.005   |
| 2   | <i>Scn1a</i> | 66.3      | 15.000         | 0.000   |
| 2   | D2Mit206     | 106.9     | 11.267         | 0.001   |
| 2   | D2Mit493     | 154.0     | 4.571          | 0.033   |
| 2   | D2Mit148     | 178.8     | 0.286          | 0.593   |
| 3   | D3Mit130     | 10.2      | 0.167          | 0.683   |
| 3   | D3Mit278     | 72.0      | 0.222          | 0.637   |
| 3   | D3Mit346     | 116.2     | 0.667          | 0.414   |
| 3   | D3Mit44      | 148.1     | 0.167          | 0.683   |
| 4   | D4Mit264     | 9.4       | 0.286          | 0.593   |
| 4   | D4Mit178     | 67.2      | 0.529          | 0.467   |
| 4   | D4Mit130     | 146.2     | 0.529          | 0.467   |
| 5   | D5Mit346     | 4.9       | 5.261          | 0.022   |
| 5   | D5Mit1       | 17.6      | 8.167          | 0.004   |
| 5   | D5Mit349     | 25.0      | 10.667         | 0.001   |
| 5   | D5Mit391     | 44.7      | 8.167          | 0.004   |
| 5   | D5Mit197     | 64.6      | 3.522          | 0.061   |
| 5   | D5Mit291     | 126.2     | 2.571          | 0.109   |
| 5   | D5Mit286     | 150.2     | 0.000          | 1.000   |
| 6   | D6Mit139     | 6.9       | 0.222          | 0.637   |
| 6   | D6Mit268     | 34.7      | 0.000          | 1.000   |
| 6   | D6Mit241     | 56.6      | 0.333          | 0.564   |
| 6   | D6Mit102     | 93.5      | 0.222          | 0.637   |
| 6   | D6Mit52      | 127.8     | 0.889          | 0.346   |
| 7   | D7Mit152     | 4.7       | 2.571          | 0.109   |
| 7   | D7Mit342     | 16.6      | 1.000          | 0.317   |
| 7   | D7Mit145     | 51.4      | 0.000          | 1.000   |
| 7   | D7Mit238     | 119.1     | 0.048          | 0.827   |
| 8   | D8Mit155     | 5.0       | 0.286          | 0.593   |
| 8   | D8Mit339     | 40.3      | 0.286          | 0.593   |
| 8   | D8Mit242     | 101.8     | 1.087          | 0.297   |
| 8   | D8Mit121     | 123.9     | 2.130          | 0.144   |
| 9   | D9Mit1001    | 39.7      | 0.800          | 0.371   |
| 9   | D9Mit1006    | 51.9      | 0.727          | 0.394   |
| 9   | D9Mit182     | 101.5     | 0.059          | 0.808   |
| 10  | D10Mit183a   | 22.4      | 1.800          | 0.180   |
| 10  | D10Mit31     | 68.3      | 0.200          | 0.655   |
| 10  | D10Mit266    | 115.0     | 0.727          | 0.394   |

| Chr | Marker    | Pos (Mb)* | $\chi^2$ value | p value |
|-----|-----------|-----------|----------------|---------|
| 11  | D11Mit71  | 6.9       | 5.762          | 0.016   |
| 11  | D11Mit2   | 12.3      | 6.000          | 0.014   |
| 11  | D11Mit78  | 17.9      | 6.000          | 0.014   |
| 11  | D11Mit188 | 45.3      | 2.667          | 0.102   |
| 11  | D11Mit310 | 54.2      | 2.130          | 0.144   |
| 11  | D11Mit48  | 118.1     | 2.130          | 0.144   |
| 12  | D12Mit12  | 24.7      | 0.474          | 0.491   |
| 12  | D12Mit201 | 72.3      | 0.391          | 0.532   |
| 12  | D12Mit263 | 113.5     | 1.087          | 0.297   |
| 13  | D13Mit64  | 45.1      | 1.087          | 0.297   |
| 13  | D13Mit99  | 76.8      | 0.000          | 1.000   |
| 13  | D13Mit77  | 116.9     | 0.043          | 0.835   |
| 14  | D14Mit109 | 12.6      | 0.053          | 0.819   |
| 14  | D14Mit268 | 54.9      | 0.800          | 0.371   |
| 14  | D14Mit165 | 106.6     | 0.043          | 0.835   |
| 15  | D15Mit252 | 22.6      | 0.800          | 0.371   |
| 15  | D15Mit85  | 40.3      | 0.889          | 0.346   |
| 15  | D15Mit242 | 90.4      | 2.130          | 0.144   |
| 16  | D16Mit129 | 6.1       | 1.143          | 0.285   |
| 16  | D16Mit64  | 57.5      | 0.182          | 0.670   |
| 16  | D16Mit106 | 97.8      | 0.077          | 0.782   |
| 17  | D17Mit19  | 4.8       | 0.600          | 0.439   |
| 17  | D17Mit50  | 45.4      | 0.391          | 0.532   |
| 17  | D17Mit180 | 51.4      | 1.087          | 0.297   |
| 18  | D18Mit64  | 6.1       | 0.043          | 0.835   |
| 18  | D18Mit60  | 32.5      | 0.000          | 1.000   |
| 18  | D18Mit55  | 53.2      | 0.391          | 0.532   |
| 18  | D18Mit40  | 63.7      | 0.474          | 0.491   |
| 19  | D19Mit135 | 31.9      | 0.000          | 1.000   |
| 19  | D19Mit10  | 47.2      | 0.200          | 0.655   |

\*GRC m38 assembly

**Supplementary Table S2.** Number of genes with significant differences by RNA-seq in *Dsm* 1.5 LOD support intervals.

| <b>Category</b>          |               | <b><i>Dsm1</i></b><br>(Chr5:50.7-77.4 Mb) | <b><i>Dsm4</i></b><br>(Chr5:14.0-107.0 Mb) | <b><i>Dsm2</i></b><br>(Chr 7:16.6-70.8 Mb) | <b><i>Dsm3</i></b><br>(Chr 8:49.6-114.4 Mb) | <b><i>Dsm5</i></b><br>(Chr 11:6.9-57.1 Mb) |
|--------------------------|---------------|-------------------------------------------|--------------------------------------------|--------------------------------------------|---------------------------------------------|--------------------------------------------|
| Expression or Regulation | Transcript    | 27                                        | 116                                        | 90                                         | 94                                          | 64                                         |
|                          | Gene          | 5                                         | 19                                         | 19                                         | 15                                          | 12                                         |
|                          | TSS           | 10                                        | 49                                         | 42                                         | 51                                          | 31                                         |
|                          | Promoter      | 14                                        | 60                                         | 70                                         | 55                                          | 36                                         |
|                          | Splicing      | 15                                        | 62                                         | 52                                         | 56                                          | 31                                         |
|                          | <b>TOTAL*</b> | <b>36</b>                                 | <b>148</b>                                 | <b>127</b>                                 | <b>122</b>                                  | <b>81</b>                                  |
| SNPs                     | Missense      | 14                                        | 61                                         | 111                                        | 105                                         | 10                                         |
|                          | Stop Gained   | -                                         | -                                          | 3                                          | -                                           | -                                          |

\*Total number of genes with a significant difference in any RNA-seq category. Genomic positions based on GRC m38 assembly.

**Supplementary Table S3.** Significant Differences in *Dsm* intervals by RNA-Seq. Significant differences are indicated by q-values (FDR-adjusted p-values); open boxes indicate no difference. Genes with a prior association with epilepsy or hyperexcitability are highlighted with yellow shading.

| Interval    | Chr | Location (Mb)*        | Gene                 | Transcript | Gene    | TSS     | Promoter | Splicing |
|-------------|-----|-----------------------|----------------------|------------|---------|---------|----------|----------|
| <i>Dsm4</i> | 5   | 14.025276 - 14.256689 | <i>Sema3e</i>        | 4.5E-02    |         |         |          | 1.7E-06  |
| <i>Dsm4</i> | 5   | 14.514918 - 14.863457 | <i>Pclo</i>          | 1.0E-14    |         |         |          | 1.1E-05  |
| <i>Dsm4</i> | 5   | 15.934691 - 16.374511 | <i>Cacna2d1</i>      | 1.1E-08    |         | 1.0E-14 | 4.4E-03  | 6.1E-11  |
| <i>Dsm4</i> | 5   | 17.574281 - 17.730268 | <i>Sema3c</i>        | 1.3E-02    |         | 1.6E-02 |          |          |
| <i>Dsm4</i> | 5   | 19.227046 - 20.704798 | <i>Magi2</i>         | 5.2E-03    |         |         |          |          |
| <i>Dsm4</i> | 5   | 20.758663 - 20.882124 | <i>Phf2</i>          | 9.8E-03    |         |         |          |          |
| <i>Dsm4</i> | 5   | 20.986645 - 21.055911 | <i>Ptpn12</i>        |            |         |         | 5.0E-02  |          |
| <i>Dsm4</i> | 5   | 21.737141 - 21.757152 | <i>Pmpcb</i>         | 3.5E-02    | 1.5E-03 |         |          |          |
| <i>Dsm4</i> | 5   | 21.884454 - 22.344702 | <i>Reln</i>          | 4.5E-02    |         |         |          |          |
| <i>Dsm4</i> | 5   | 23.434441 - 23.504235 | <i>Mll5</i>          | 2.2E-05    |         |         |          |          |
| <i>Dsm4</i> | 5   | 23.787711 - 23.820369 | <i>Rint1</i>         | 2.7E-02    |         | 1.5E-03 | 2.1E-04  | 7.3E-06  |
| <i>Dsm4</i> | 5   | 23.915276 - 24.030690 | <i>Fam126a</i>       | 4.9E-03    |         | 6.3E-03 | 2.8E-02  | 1.0E-14  |
| <i>Dsm4</i> | 5   | 24.319589 - 24.351604 | <i>Kcnh2</i>         | 7.8E-03    |         | 1.0E-02 |          |          |
| <i>Dsm4</i> | 5   | 24.393663 - 24.410054 | <i>Abcb8</i>         | 4.3E-02    |         | 1.0E-02 | 8.0E-03  |          |
| <i>Dsm4</i> | 5   | 24.423837 - 24.440950 | <i>Slc4a2</i>        | 2.0E-02    |         | 5.0E-02 | 5.1E-03  | 1.7E-03  |
| <i>Dsm4</i> | 5   | 24.438440 - 24.445287 | <i>Fastk</i>         | 4.3E-02    | 3.2E-02 | 3.0E-02 |          |          |
| <i>Dsm4</i> | 5   | 24.452177 - 24.502047 | <i>Agap3</i>         |            |         |         | 1.6E-02  |          |
| <i>Dsm4</i> | 5   | 24.586741 - 24.594395 | <i>Chpf2</i>         | 1.4E-03    |         |         |          | 3.9E-03  |
| <i>Dsm4</i> | 5   | 24.590818 - 24.602012 | <i>Smarcd3</i>       | 3.1E-02    |         |         |          |          |
| <i>Dsm4</i> | 5   | 24.802823 - 24.842624 | <i>Rheb</i>          | 9.1E-03    | 4.2E-02 |         |          |          |
| <i>Dsm4</i> | 5   | 24.862744 - 25.100642 | <i>Prkag2</i>        |            |         |         | 4.9E-02  | 2.4E-03  |
| <i>Dsm4</i> | 5   | 24.985842 - 24.998168 | <i>1500035N22Rik</i> | 1.2E-02    | 2.7E-02 | 1.6E-02 |          |          |
| <i>Dsm4</i> | 5   | 25.222882 - 25.265918 | <i>Galnt11</i>       | 1.9E-02    |         |         |          |          |
| <i>Dsm4</i> | 5   | 25.271798 - 25.498783 | <i>Mll3</i>          | 5.6E-03    |         |         |          | 4.5E-02  |
| <i>Dsm4</i> | 5   | 25.759997 - 25.850342 | <i>Actr3b</i>        | 2.1E-04    |         |         |          |          |
| <i>Dsm4</i> | 5   | 26.817203 - 27.727505 | <i>Dpp6</i>          | 2.5E-02    |         |         |          |          |
| <i>Dsm4</i> | 5   | 28.071363 - 28.078662 | <i>Insig1</i>        | 1.2E-02    | 2.7E-02 | 1.5E-02 |          |          |
| <i>Dsm4</i> | 5   | 28.200819 - 28.245792 | <i>Cnpy1</i>         | 4.9E-02    |         |         |          |          |
| <i>Dsm4</i> | 5   | 29.195992 - 29.225524 | <i>Rnf32</i>         | 3.4E-02    |         |         |          |          |
| <i>Dsm4</i> | 5   | 30.118301 - 30.184593 | <i>Hadha</i>         |            |         |         |          | 3.6E-02  |
| <i>Dsm4</i> | 5   | 30.232581 - 30.272012 | <i>Ept1</i>          | 2.8E-02    |         |         |          |          |
| <i>Dsm4</i> | 5   | 30.711564 - 30.799375 | <i>Dpysl5</i>        |            |         |         | 2.9E-02  |          |
| <i>Dsm4</i> | 5   | 30.814641 - 30.866106 | <i>Mapre3</i>        |            |         |         | 3.8E-02  | 1.3E-02  |
| <i>Dsm4</i> | 5   | 30.869579 - 30.879191 | <i>Tmem214</i>       |            |         |         |          | 1.2E-03  |
| <i>Dsm4</i> | 5   | 30.888694 - 30.906965 | <i>Agl5</i>          | 4.1E-02    |         |         |          | 1.4E-02  |
| <i>Dsm4</i> | 5   | 30.950066 - 30.955091 | <i>Abhd1</i>         | 1.9E-08    | 3.8E-05 | 9.1E-09 | 1.0E-14  | 3.0E-05  |
| <i>Dsm4</i> | 5   | 30.950853 - 30.960330 | <i>Preb</i>          | 2.1E-02    |         |         | 1.2E-04  | 2.5E-02  |
| <i>Dsm4</i> | 5   | 31.036036 - 31.048924 | <i>Slc5a6</i>        | 5.0E-02    |         | 2.3E-03 | 7.1E-03  | 1.0E-14  |
| <i>Dsm4</i> | 5   | 31.048312 - 31.054633 | <i>0610007C21Rik</i> | 1.1E-02    | 5.2E-04 | 3.9E-03 | 1.0E-14  | 1.5E-02  |

| <b>Interval</b> | <b>Chr</b> | <b>Location (Mb)*</b> | <b>Gene</b>          | <b>Transcript</b> | <b>Gene</b> | <b>TSS</b> | <b>Promoter</b> | <b>Splicing</b> |
|-----------------|------------|-----------------------|----------------------|-------------------|-------------|------------|-----------------|-----------------|
| <i>Dsm4</i>     | 5          | 31.054780 - 31.078479 | <i>Cad</i>           | 4.1E-03           |             | 5.3E-03    | 1.5E-09         |                 |
| <i>Dsm4</i>     | 5          | 31.140660 - 31.158153 | <i>Gtf3c2,Mpv17</i>  |                   |             |            | 2.5E-06         |                 |
| <i>Dsm4</i>     | 5          | 31.140660 - 31.158153 | <i>Mpv17</i>         | 2.2E-02           |             |            |                 | 3.1E-02         |
| <i>Dsm4</i>     | 5          | 31.151142 - 31.180144 | <i>Gtf3c2</i>        | 4.7E-02           |             |            |                 | 3.2E-02         |
| <i>Dsm4</i>     | 5          | 31.187558 - 31.193430 | <i>Eif2b4</i>        | 2.0E-04           |             |            |                 |                 |
| <i>Dsm4</i>     | 5          | 31.193227 - 31.198900 | <i>Snx17</i>         | 3.3E-02           |             | 4.1E-02    | 1.9E-03         | 4.4E-05         |
| <i>Dsm4</i>     | 5          | 31.624439 - 31.697627 | <i>Rbks</i>          | 2.6E-02           |             |            |                 |                 |
| <i>Dsm4</i>     | 5          | 31.697684 - 32.084962 | <i>Bre</i>           | 2.4E-03           |             |            |                 |                 |
| <i>Dsm4</i>     | 5          | 32.136472 - 32.157831 | <i>Fosl2</i>         | 4.1E-02           |             |            |                 |                 |
| <i>Dsm4</i>     | 5          | 32.736301 - 32.785646 | <i>Pisd</i>          | 4.5E-02           |             | 1.2E-02    |                 | 3.3E-02         |
| <i>Dsm4</i>     | 5          | 32.789218 - 32.854256 | <i>C330019G07Rik</i> | 3.0E-02           | 1.6E-04     | 3.9E-02    | 9.2E-03         | 5.7E-03         |
| <i>Dsm4</i>     | 5          | 32.863701 - 32.994231 | <i>Depdc5</i>        | 3.2E-02           |             |            |                 |                 |
| <i>Dsm4</i>     | 5          | 33.018816 - 33.027966 | <i>Ywhah</i>         | 1.3E-02           |             |            |                 |                 |
| <i>Dsm4</i>     | 5          | 33.721724 - 33.737068 | <i>Fgfr3</i>         | 3.3E-03           |             | 2.2E-02    | 6.7E-03         | 4.4E-02         |
| <i>Dsm4</i>     | 5          | 33.759366 - 33.759536 | <i>Gm10059</i>       | 1.0E-14           | 1.0E-14     |            |                 |                 |
| <i>Dsm4</i>     | 5          | 33.820725 - 33.897975 | <i>Whsc1</i>         | 3.2E-02           |             |            | 4.8E-07         | 1.5E-03         |
| <i>Dsm4</i>     | 5          | 34.194874 - 34.288449 | <i>Zfyve28</i>       | 3.6E-02           |             |            | 2.2E-03         | 3.1E-02         |
| <i>Dsm4</i>     | 5          | 34.573664 - 34.632308 | <i>Add1</i>          | 1.4E-02           |             |            | 4.8E-04         | 1.1E-03         |
| <i>Dsm4</i>     | 5          | 34.949445 - 35.039644 | <i>Rgs12</i>         | 2.7E-02           |             |            |                 | 1.3E-06         |
| <i>Dsm4</i>     | 5          | 35.091490 - 35.105766 | <i>Lrpap1</i>        | 1.9E-02           |             | 2.4E-02    | 3.9E-02         |                 |
| <i>Dsm4</i>     | 5          | 35.757880 - 35.884973 | <i>Ablim2</i>        | 1.4E-02           |             | 1.5E-02    | 8.2E-04         | 4.4E-03         |
| <i>Dsm4</i>     | 5          | 36.490604 - 36.593276 | <i>Tbc1d14</i>       | 3.7E-02           |             | 4.6E-02    | 0.0E+00         | 6.8E-04         |
| <i>Dsm4</i>     | 5          | 36.868513 - 36.955078 | <i>Ppp2r2c</i>       |                   |             |            | 4.1E-03         |                 |
| <i>Dsm4</i>     | 5          | 36.966104 - 36.988982 | <i>Wfs1</i>          |                   | 1.9E-02     | 4.7E-02    |                 |                 |
| <i>Dsm4</i>     | 5          | 37.242080 - 37.292132 | <i>Crmp1</i>         | 3.4E-02           |             | 2.8E-02    |                 |                 |
| <i>Dsm4</i>     | 5          | 37.289098 - 37.336894 | <i>Evc</i>           |                   |             |            | 6.2E-03         | 1.1E-02         |
| <i>Dsm4</i>     | 5          | 38.038742 - 38.137765 | <i>Stx18</i>         |                   |             |            | 1.7E-02         |                 |
| <i>Dsm4</i>     | 5          | 38.260185 - 38.269622 | <i>Tmem128</i>       | 1.5E-02           |             |            | 8.0E-03         |                 |
| <i>Dsm4</i>     | 5          | 43.662379 - 43.740972 | <i>Cc2d2a</i>        | 3.7E-02           |             |            |                 |                 |
| <i>Dsm4</i>     | 5          | 43.744616 - 43.821639 | <i>Fbxl5</i>         | 2.5E-03           |             | 8.7E-08    |                 |                 |
| <i>Dsm4</i>     | 5          | 43.818886 - 43.843247 | <i>Bst1</i>          | 4.8E-03           |             | 4.5E-03    | 5.2E-04         | 2.9E-03         |
| <i>Dsm4</i>     | 5          | 43.993625 - 44.102032 | <i>Prom1</i>         | 3.2E-02           |             |            |                 |                 |
| <i>Dsm4</i>     | 5          | 45.434032 - 45.450235 | <i>Qdpr</i>          | 1.9E-03           | 7.2E-08     | 2.4E-03    | 4.2E-02         | 4.0E-02         |
| <i>Dsm4</i>     | 5          | 45.669922 - 45.700544 | <i>Ncapg</i>         |                   |             |            | 8.0E-03         |                 |
| <i>Dsm4</i>     | 5          | 45.697181 - 45.857615 | <i>Lcorl</i>         |                   |             | 2.6E-02    |                 | 2.0E-02         |
| <i>Dsm4</i>     | 5          | 47.983155 - 48.306282 | <i>Slit2</i>         | 4.7E-04           |             |            |                 |                 |
| <i>Dsm1</i>     | 5          | 52.537864 - 52.566303 | <i>Lgi2</i>          | 3.9E-03           | 9.4E-03     | 6.2E-03    |                 | 9.2E-03         |
| <i>Dsm1</i>     | 5          | 52.640087 - 52.669729 | <i>Sept11</i>        | 4.7E-02           |             |            |                 | 2.3E-03         |
| <i>Dsm1</i>     | 5          | 52.834015 - 52.867797 | <i>Anapc4</i>        |                   |             |            | 2.2E-03         |                 |
| <i>Dsm1</i>     | 5          | 53.267106 - 53.283510 | <i>1810013D10Rik</i> |                   |             |            |                 | 3.8E-02         |
| <i>Dsm1</i>     | 5          | 53.555779 - 53.657445 | <i>Rbpj</i>          | 9.1E-04           | 4.8E-02     | 1.2E-03    |                 |                 |
| <i>Dsm1</i>     | 5          | 53.998417 - 54.121057 | <i>Stim2</i>         | 5.1E-04           |             |            |                 |                 |

| <b>Interval</b> | <b>Chr</b> | <b>Location (Mb)*</b> | <b>Gene</b>          | <b>Transcript</b> | <b>Gene</b> | <b>TSS</b> | <b>Promoter</b> | <b>Splicing</b> |
|-----------------|------------|-----------------------|----------------------|-------------------|-------------|------------|-----------------|-----------------|
| <i>Dsm1</i>     | 5          | 57.718021 - 58.129351 | <i>Pcdh7</i>         |                   |             |            | 7.7E-03         |                 |
| <i>Dsm1</i>     | 5          | 62.602445 - 62.766198 | <i>Arap2</i>         |                   |             |            | 1.1E-02         |                 |
| <i>Dsm1</i>     | 5          | 64.159451 - 64.351486 | <i>Tbc1d1</i>        | 3.1E-02           |             |            |                 |                 |
| <i>Dsm1</i>     | 5          | 65.107568 - 65.168188 | <i>Klhl5</i>         | 4.8E-02           |             |            |                 |                 |
| <i>Dsm1</i>     | 5          | 65.199696 - 65.260415 | <i>Wdr19</i>         | 3.4E-02           |             | 4.3E-02    |                 |                 |
| <i>Dsm1</i>     | 5          | 65.413202 - 65.435946 | <i>Ugdh</i>          | 6.2E-04           |             | 8.1E-04    | 3.5E-04         |                 |
| <i>Dsm1</i>     | 5          | 65.446844 - 65.537184 | <i>1110003E01Rik</i> |                   |             |            | 3.2E-02         |                 |
| <i>Dsm1</i>     | 5          | 65.537233 - 65.598988 | <i>Ube2k</i>         | 3.0E-03           |             | 3.9E-03    | 1.1E-02         |                 |
| <i>Dsm1</i>     | 5          | 66.298861 - 66.618828 | <i>Apbb2</i>         | 2.8E-02           |             |            |                 |                 |
| <i>Dsm1</i>     | 5          | 66.745835 - 67.057159 | <i>Limch1</i>        | 2.5E-02           |             |            |                 |                 |
| <i>Dsm1</i>     | 5          | 67.260565 - 67.291461 | <i>Tmem33</i>        | 1.5E-03           |             |            |                 | 1.2E-02         |
| <i>Dsm1</i>     | 5          | 67.607883 - 67.623552 | <i>Shisa3</i>        |                   |             |            |                 | 0.0E+00         |
| <i>Dsm1</i>     | 5          | 67.618140 - 67.847432 | <i>Atp8a1</i>        |                   |             |            | 1.0E-14         | 2.2E-04         |
| <i>Dsm1</i>     | 5          | 67.847066 - 67.909013 | <i>Gm15477</i>       |                   |             |            |                 | 2.2E-02         |
| <i>Dsm1</i>     | 5          | 69.556924 - 69.575972 | <i>Guf1</i>          | 3.6E-02           |             | 4.5E-02    | 3.1E-02         | 3.5E-03         |
| <i>Dsm1</i>     | 5          | 69.573108 - 69.592337 | <i>Gnpda2</i>        |                   |             |            |                 | 4.1E-02         |
| <i>Dsm1</i>     | 5          | 70.961057 - 71.095849 | <b><i>Gabra2</i></b> | 1.0E-14           | 1.0E-14     | 1.0E-14    |                 |                 |
| <i>Dsm1</i>     | 5          | 73.020322 - 73.256618 | <i>Fryl</i>          | 2.5E-02           |             | 3.1E-02    | 4.5E-03         |                 |
| <i>Dsm1</i>     | 5          | 73.292794 - 73.314077 | <i>Ociad1</i>        | 2.7E-02           |             |            |                 | 0.0E+00         |
| <i>Dsm1</i>     | 5          | 73.481002 - 73.560794 | <i>Dcun1d4</i>       | 4.8E-02           |             |            | 2.8E-02         | 3.0E-02         |
| <i>Dsm1</i>     | 5          | 73.998463 - 74.068430 | <i>Usp46</i>         | 4.2E-02           |             |            |                 |                 |
| <i>Dsm1</i>     | 5          | 74.204816 - 74.531747 | <i>Scfd2</i>         | 1.6E-04           |             |            |                 |                 |
| <i>Dsm1</i>     | 5          | 74.535449 - 74.598790 | <i>Fip1l1</i>        | 3.4E-02           |             |            | 3.1E-02         | 1.0E-14         |
| <i>Dsm1</i>     | 5          | 74.592446 - 74.702911 | <i>Lnxl</i>          | 3.9E-02           |             | 4.9E-02    | 7.1E-14         | 1.0E-14         |
| <i>Dsm1</i>     | 5          | 75.932827 - 75.978458 | <i>Kdr</i>           | 2.0E-02           | 4.4E-02     | 2.5E-02    |                 |                 |
| <i>Dsm1</i>     | 5          | 76.212177 - 76.304548 | <i>Clock</i>         | 4.7E-02           |             |            |                 |                 |
| <i>Dsm1</i>     | 5          | 76.529311 - 76.570294 | <i>Exoc1</i>         | 4.1E-03           |             |            | 2.6E-02         | 2.9E-02         |
| <i>Dsm1</i>     | 5          | 76.928368 - 76.947758 | <i>2310040G07Rik</i> | 9.3E-04           | 1.7E-03     |            |                 |                 |
| <i>Dsm1</i>     | 5          | 76.951307 - 76.967509 | <i>Paics</i>         | 3.3E-02           |             |            |                 |                 |
| <i>Dsm1</i>     | 5          | 76.974683 - 76.999937 | <i>Srp72</i>         | 2.7E-02           |             |            | 3.7E-02         | 4.1E-03         |
| <i>Dsm4</i>     | 5          | 81.020138 - 81.825133 | <i>Lphn3</i>         | 4.6E-02           |             |            |                 |                 |
| <i>Dsm4</i>     | 5          | 84.057791 - 84.417382 | <i>Epha5</i>         | 3.1E-02           |             |            |                 |                 |
| <i>Dsm4</i>     | 5          | 84.123313 - 84.123591 | <i>Hmgn2-ps1</i>     | 3.5E-04           | 6.7E-04     |            |                 |                 |
| <i>Dsm4</i>     | 5          | 86.110720 - 86.172803 | <i>Uba6</i>          | 3.6E-02           |             | 4.5E-02    |                 | 2.1E-05         |
| <i>Dsm4</i>     | 5          | 86.804221 - 86.836659 | <i>Ythdc1</i>        | 4.3E-02           |             |            |                 |                 |
| <i>Dsm4</i>     | 5          | 88.583574 - 88.642671 | <i>Rufy3</i>         |                   |             |            | 3.2E-02         |                 |
| <i>Dsm4</i>     | 5          | 88.659448 - 88.676171 | <i>Grsf1</i>         |                   |             |            |                 | 4.4E-02         |
| <i>Dsm4</i>     | 5          | 88.886818 - 89.239653 | <i>Slc4a4</i>        |                   |             |            |                 | 1.7E-02         |
| <i>Dsm4</i>     | 5          | 89.673841 - 89.883334 | <i>Adamts3</i>       | 6.3E-06           |             |            |                 |                 |
| <i>Dsm4</i>     | 5          | 90.227190 - 90.366185 | <i>Ankrd17</i>       | 4.3E-02           |             |            |                 |                 |
| <i>Dsm4</i>     | 5          | 92.006074 - 92.043042 | <i>Cdkl2</i>         | 7.8E-03           |             |            |                 |                 |
| <i>Dsm4</i>     | 5          | 92.052146 - 92.083735 | <i>G3bp2</i>         | 2.5E-13           |             |            |                 |                 |



| <b>Interval</b> | <b>Chr</b> | <b>Location (Mb)*</b>   | <b>Gene</b>          | <b>Transcript</b> | <b>Gene</b> | <b>TSS</b> | <b>Promoter</b> | <b>Splicing</b> |
|-----------------|------------|-------------------------|----------------------|-------------------|-------------|------------|-----------------|-----------------|
| <i>Dsm4</i>     | 5          | 93.093457 - 93.174958   | <i>Sepsecs</i>       | 2.2E-04           |             |            |                 |                 |
| <i>Dsm4</i>     | 5          | 93.267257 - 93.276231   | <i>Ccng2</i>         | 2.4E-02           |             |            | 3.5E-07         | 7.4E-03         |
| <i>Dsm4</i>     | 5          | 96.070333 - 96.164171   | <i>Cnot6l</i>        | 9.6E-03           |             | 7.5E-03    | 4.4E-02         | 7.9E-06         |
| <i>Dsm4</i>     | 5          | 97.082329 - 97.111596   | <i>Paqr3</i>         |                   |             |            |                 | 7.5E-03         |
| <i>Dsm4</i>     | 5          | 99.217426 - 99.252927   | <i>Rasgef1b</i>      | 1.0E-02           |             | 1.3E-02    | 2.7E-05         |                 |
| <i>Dsm4</i>     | 5          | 99.958426 - 99.978938   | <i>Hnrnpd</i>        | 4.7E-02           | 7.6E-03     | 2.7E-03    | 3.5E-02         | 4.6E-05         |
| <i>Dsm4</i>     | 5          | 100.033577 - 100.039664 | <i>Hnrpdl</i>        | 2.3E-03           |             | 3.0E-03    | 4.4E-03         |                 |
| <i>Dsm4</i>     | 5          | 100.077872 - 100.159808 | <i>Tnem150c</i>      | 1.1E-02           |             | 1.5E-02    | 1.0E-14         |                 |
| <i>Dsm4</i>     | 5          | 100.077962 - 100.095273 | <i>5830403M04Rik</i> |                   |             |            | 1.0E-14         |                 |
| <i>Dsm4</i>     | 5          | 100.361650 - 100.416234 | <i>Sec31a</i>        | 1.2E-03           |             |            |                 | 5.3E-03         |
| <i>Dsm4</i>     | 5          | 100.518309 - 100.547803 | <i>Cops4</i>         | 1.0E-02           |             | 1.3E-02    | 3.2E-03         |                 |
| <i>Dsm4</i>     | 5          | 100.654723 - 100.675140 | <i>Coq2</i>          |                   |             |            | 1.7E-02         |                 |
| <i>Dsm4</i>     | 5          | 100.762145 - 100.798598 | <i>Helq</i>          | 4.3E-02           |             | 1.5E-02    | 4.5E-04         | 1.1E-02         |
| <i>Dsm4</i>     | 5          | 102.907948 - 103.211334 | <i>Mapk10</i>        | 3.7E-03           |             | 4.8E-03    | 6.6E-07         | 2.3E-09         |
| <i>Dsm4</i>     | 5          | 103.692374 - 103.855322 | <i>Affl1</i>         | 3.7E-02           |             | 4.6E-02    |                 |                 |
| <i>Dsm4</i>     | 5          | 103.861973 - 103.911259 | <i>Klhl8</i>         | 4.6E-02           |             |            |                 |                 |
| <i>Dsm4</i>     | 5          | 104.079111 - 104.114088 | <i>Sparcl1</i>       | 1.0E-14           | 1.0E-14     | 1.0E-14    |                 |                 |
| <i>Dsm4</i>     | 5          | 104.435118 - 104.441050 | <i>Spp1</i>          | 2.5E-02           |             |            | 9.0E-04         | 5.0E-02         |
| <i>Dsm4</i>     | 5          | 104.525735 - 104.554211 | <i>D930016D06Rik</i> | 3.5E-02           |             | 4.4E-02    |                 |                 |
| <i>Dsm4</i>     | 5          | 105.519388 - 105.613018 | <i>Lrrc8c</i>        |                   |             |            |                 | 2.6E-02         |
| <i>Dsm4</i>     | 5          | 105.699969 - 105.832436 | <i>Lrrc8d</i>        | 3.5E-02           |             |            |                 |                 |
| <i>Dsm4</i>     | 5          | 105.814773 - 105.818988 | <i>Gm15817</i>       | 2.7E-02           |             |            |                 |                 |
| <i>Dsm4</i>     | 5          | 105.876565 - 105.915818 | <i>Zfp326</i>        | 1.8E-02           |             |            | 8.8E-03         | 1.6E-02         |
| <i>Dsm4</i>     | 5          | 106.500894 - 106.697287 | <i>Zfp644</i>        | 2.3E-02           |             |            |                 |                 |
| <i>Dsm2</i>     | 7          | 16.098458 - 16.117975   | <i>Napa</i>          |                   |             |            | 1.0E-02         |                 |
| <i>Dsm2</i>     | 7          | 16.119895 - 16.127516   | <i>Kptn</i>          | 2.3E-02           |             | 9.3E-03    |                 |                 |
| <i>Dsm2</i>     | 7          | 16.274042 - 16.286795   | <i>Ccdc9</i>         | 3.9E-04           |             | 5.1E-04    | 7.7E-08         |                 |
| <i>Dsm2</i>     | 7          | 16.327053 - 16.387797   | <i>Sae1</i>          | 3.1E-03           | 6.2E-03     | 4.2E-03    |                 |                 |
| <i>Dsm2</i>     | 7          | 16.738410 - 16.749294   | <i>Ap2s1</i>         |                   |             |            | 4.0E-02         |                 |
| <i>Dsm2</i>     | 7          | 16.815889 - 16.840931   | <i>Strn4</i>         |                   |             |            | 4.5E-02         |                 |
| <i>Dsm2</i>     | 7          | 16.915379 - 16.924114   | <i>Calm3</i>         | 2.5E-03           | 4.9E-03     | 3.2E-03    |                 |                 |
| <i>Dsm2</i>     | 7          | 17.004640 - 17.027924   | <i>Ppp5c</i>         | 2.9E-02           |             | 3.7E-02    | 2.6E-03         |                 |
| <i>Dsm2</i>     | 7          | 17.074040 - 17.133450   | <i>Psg16</i>         | 1.6E-02           | 9.6E-04     | 5.6E-03    |                 | 3.6E-03         |
| <i>Dsm2</i>     | 7          | 18.989554 - 18.992774   | <i>Gm10676</i>       | 9.6E-03           | 2.0E-02     |            |                 |                 |
| <i>Dsm2</i>     | 7          | 19.076249 - 19.082776   | <i>Dmwd</i>          | 2.4E-07           |             |            | 3.8E-03         |                 |
| <i>Dsm2</i>     | 7          | 19.083849 - 19.093821   | <i>Dmpk</i>          | 4.3E-02           |             |            | 1.9E-02         | 2.2E-03         |
| <i>Dsm2</i>     | 7          | 19.344778 - 19.356524   | <i>Ercc1</i>         | 3.9E-02           |             |            |                 | 1.1E-04         |
| <i>Dsm2</i>     | 7          | 19.382010 - 19.395694   | <i>Ercc2</i>         | 4.0E-02           |             |            |                 |                 |
| <i>Dsm2</i>     | 7          | 19.386643 - 19.386717   | <i>Ercc2,Mir343</i>  |                   | 9.5E-04     |            |                 |                 |
| <i>Dsm2</i>     | 7          | 19.696109 - 19.699166   | <i>Apoe</i>          |                   |             |            | 3.5E-04         |                 |
| <i>Dsm2</i>     | 7          | 19.701313 - 19.715438   | <i>Tomm40</i>        | 1.5E-02           |             |            |                 | 4.1E-02         |
| <i>Dsm2</i>     | 7          | 24.399619 - 24.422778   | <i>I500002O20Rik</i> |                   |             |            | 1.6E-02         |                 |

| <b>Interval</b> | <b>Chr</b> | <b>Location (Mb)*</b> | <b>Gene</b>         | <b>Transcript</b> | <b>Gene</b> | <b>TSS</b> | <b>Promoter</b> | <b>Splicing</b> |
|-----------------|------------|-----------------------|---------------------|-------------------|-------------|------------|-----------------|-----------------|
| <i>Dsm2</i>     | 7          | 24.902912 - 24.926592 | <i>Arhgef1</i>      | 6.5E-03           |             | 4.6E-03    | 9.1E-03         | 5.9E-08         |
| <i>Dsm2</i>     | 7          | 24.978167 - 25.005957 | <i>Atp1a3</i>       | 1.0E-14           | 3.8E-09     | 1.1E-10    | 2.1E-02         |                 |
| <i>Dsm2</i>     | 7          | 25.267704 - 25.294159 | <i>Cic</i>          | 2.7E-02           |             | 1.3E-02    | 8.5E-04         | 2.7E-03         |
| <i>Dsm2</i>     | 7          | 25.306106 - 25.316195 | <i>Tmem145</i>      | 1.3E-02           |             | 3.6E-02    |                 |                 |
| <i>Dsm2</i>     | 7          | 25.711106 - 25.719088 | <i>Ccdc97</i>       |                   |             |            |                 | 3.2E-03         |
| <i>Dsm2</i>     | 7          | 25.721498 - 25.754730 | <i>Hnrnpull</i>     |                   |             |            |                 | 8.5E-03         |
| <i>Dsm2</i>     | 7          | 25.757273 - 25.788705 | <i>Axl</i>          | 2.7E-02           |             |            |                 |                 |
| <i>Dsm2</i>     | 7          | 27.153714 - 27.158668 | <i>Cyp2t4</i>       | 7.1E-03           | 1.1E-04     | 9.1E-03    | 8.9E-03         |                 |
| <i>Dsm2</i>     | 7          | 27.158658 - 27.166802 | <i>Egln2</i>        |                   |             |            | 3.1E-03         |                 |
| <i>Dsm2</i>     | 7          | 27.168424 - 27.178896 | <i>Mia1,Rab4b</i>   |                   |             |            | 6.8E-11         |                 |
| <i>Dsm2</i>     | 7          | 27.168424 - 27.178896 | <i>Rab4b</i>        | 6.4E-05           |             |            |                 | 3.1E-06         |
| <i>Dsm2</i>     | 7          | 27.179742 - 27.181157 | <i>Mia1</i>         | 5.9E-06           |             |            |                 | 1.0E-14         |
| <i>Dsm2</i>     | 7          | 27.187005 - 27.196271 | <i>Snrpa</i>        | 7.4E-03           |             |            |                 |                 |
| <i>Dsm2</i>     | 7          | 27.233023 - 27.262252 | <i>Adck4</i>        | 4.2E-02           |             |            |                 |                 |
| <i>Dsm2</i>     | 7          | 27.258433 - 27.282144 | <i>Numbl</i>        | 3.3E-02           |             |            |                 |                 |
| <i>Dsm2</i>     | 7          | 27.305136 - 27.337692 | <i>Libp4</i>        | 4.2E-02           |             | 1.3E-02    | 2.4E-03         | 1.3E-02         |
| <i>Dsm2</i>     | 7          | 27.342133 - 27.356019 | <i>Shkbp1</i>       | 2.1E-02           |             |            |                 |                 |
| <i>Dsm2</i>     | 7          | 27.356383 - 27.447686 | <i>Shkbp1,Spnb4</i> |                   | 3.1E-02     |            |                 |                 |
| <i>Dsm2</i>     | 7          | 27.356383 - 27.447686 | <i>Spnb4</i>        | 2.6E-02           |             |            |                 |                 |
| <i>Dsm2</i>     | 7          | 27.523267 - 27.531175 | <i>Hipk4</i>        |                   |             | 2.1E-02    | 2.1E-03         |                 |
| <i>Dsm2</i>     | 7          | 27.591552 - 27.640826 | <i>Akt2</i>         | 2.8E-02           |             | 1.6E-02    | 2.0E-02         | 8.0E-04         |
| <i>Dsm2</i>     | 7          | 27.656375 - 27.674598 | <i>Map3k10</i>      |                   |             |            | 4.7E-02         |                 |
| <i>Dsm2</i>     | 7          | 27.731389 - 27.753702 | <i>Zfp60</i>        |                   |             |            | 4.4E-02         |                 |
| <i>Dsm2</i>     | 7          | 28.041707 - 28.050101 | <i>Psmc4</i>        | 2.2E-02           |             | 2.9E-02    | 2.0E-04         |                 |
| <i>Dsm2</i>     | 7          | 28.392951 - 28.399388 | <i>Paf1</i>         | 2.5E-02           |             | 3.2E-02    | 2.0E-03         |                 |
| <i>Dsm2</i>     | 7          | 28.758251 - 28.767512 | <i>Nfkbib</i>       | 5.1E-04           |             | 6.7E-04    | 2.0E-04         |                 |
| <i>Dsm2</i>     | 7          | 28.766735 - 28.788665 | <i>Sirt2</i>        | 2.8E-02           | 4.4E-04     | 3.6E-02    | 2.2E-03         | 2.2E-02         |
| <i>Dsm2</i>     | 7          | 28.808541 - 28.822266 | <i>Hnrnp1</i>       | 5.0E-03           |             |            |                 |                 |
| <i>Dsm2</i>     | 7          | 29.303951 - 29.317588 | <i>Dpfl</i>         | 4.6E-02           |             |            |                 | 1.3E-02         |
| <i>Dsm2</i>     | 7          | 29.859979 - 29.877292 | <i>Zfp420</i>       | 4.1E-02           |             |            | 2.5E-02         | 3.2E-03         |
| <i>Dsm2</i>     | 7          | 29.893333 - 29.906572 | <i>Zfp27</i>        | 3.5E-02           |             |            |                 | 7.1E-05         |
| <i>Dsm2</i>     | 7          | 30.161274 - 30.169727 | <i>Zfp146</i>       | 1.4E-02           |             | 1.7E-02    |                 |                 |
| <i>Dsm2</i>     | 7          | 30.186942 - 30.195164 | <i>Capns1</i>       |                   |             |            | 8.8E-03         |                 |
| <i>Dsm2</i>     | 7          | 30.224131 - 30.232272 | <i>Tbcb</i>         | 3.4E-02           |             |            |                 |                 |
| <i>Dsm2</i>     | 7          | 30.231948 - 30.233390 | <i>Polr2i</i>       | 4.7E-02           |             | 8.5E-05    | 3.6E-02         | 1.1E-03         |
| <i>Dsm2</i>     | 7          | 30.291672 - 30.308367 | <i>Clip3</i>        |                   |             |            | 2.6E-05         | 2.9E-02         |
| <i>Dsm2</i>     | 7          | 30.308717 - 30.314304 | <i>Alkbh6</i>       | 2.3E-02           |             | 2.9E-02    | 1.3E-04         |                 |
| <i>Dsm2</i>     | 7          | 30.434981 - 30.445582 | <i>Aplp1</i>        | 1.0E-14           | 1.0E-14     | 1.0E-14    |                 |                 |
| <i>Dsm2</i>     | 7          | 30.522226 - 30.534180 | <i>Arhgap33</i>     | 1.4E-02           |             | 1.8E-02    | 4.4E-03         |                 |
| <i>Dsm2</i>     | 7          | 30.563301 - 30.567960 | <i>U2af114</i>      | 4.6E-02           |             | 5.5E-04    |                 | 1.0E-14         |
| <i>Dsm2</i>     | 7          | 30.568858 - 30.588726 | <i>Wbp7</i>         | 1.1E-02           | 3.8E-02     | 1.4E-02    | 7.8E-08         | 1.6E-02         |
| <i>Dsm2</i>     | 7          | 30.640994 - 30.650317 | <i>Haus5,Rbm42</i>  |                   |             |            | 1.6E-10         |                 |

| <b>Interval</b> | <b>Chr</b> | <b>Location (Mb)*</b> | <b>Gene</b>   | <b>Transcript</b> | <b>Gene</b> | <b>TSS</b> | <b>Promoter</b> | <b>Splicing</b> |
|-----------------|------------|-----------------------|---------------|-------------------|-------------|------------|-----------------|-----------------|
| Dsm2            | 7          | 30.653711 - 30.664994 | Haus5         | 3.5E-02           |             | 4.5E-02    |                 | 1.3E-03         |
| Dsm2            | 7          | 30.899183 - 30.914327 | Mag           | 6.4E-03           | 3.2E-06     | 2.4E-06    |                 | 7.1E-06         |
| Dsm2            | 7          | 30.945252 - 30.956803 | Usf2          | 2.7E-02           |             |            | 2.5E-02         | 2.2E-02         |
| Dsm2            | 7          | 30.957409 - 30.983169 | Lsr           |                   |             |            | 3.0E-02         | 3.0E-04         |
| Dsm2            | 7          | 30.973804 - 30.989720 | Fam187b       |                   |             |            | 1.4E-10         |                 |
| Dsm2            | 7          | 31.042517 - 31.051462 | Fxyd7         | 4.4E-02           |             |            |                 | 1.0E-14         |
| Dsm2            | 7          | 31.059342 - 31.070935 | Lgi4          | 2.9E-02           | 2.3E-02     | 3.6E-02    | 1.0E-14         |                 |
| Dsm2            | 7          | 31.068172 - 31.076704 | Fxyd3         |                   |             |            | 3.0E-03         | 3.8E-02         |
| Dsm2            | 7          | 34.140689 - 34.169599 | Uba2          |                   |             |            | 1.3E-02         |                 |
| Dsm2            | 7          | 34.202122 - 34.230289 | Gpi1          |                   |             |            | 1.1E-02         |                 |
| Dsm2            | 7          | 35.186385 - 35.204898 | Slc7a10       | 3.8E-02           |             |            |                 | 2.0E-02         |
| Dsm2            | 7          | 35.200027 - 35.215370 | Lrp3          | 3.6E-03           |             | 3.2E-02    |                 |                 |
| Dsm2            | 7          | 35.685165 - 35.754454 | Dpy19l3       |                   |             |            | 6.5E-03         | 7.5E-03         |
| Dsm2            | 7          | 43.296197 - 43.313294 | Zfp715        |                   |             |            |                 | 2.7E-05         |
| Dsm2            | 7          | 44.310253 - 44.358351 | Shank1        | 2.3E-02           | 7.0E-03     |            | 2.9E-02         |                 |
| Dsm2            | 7          | 44.360043 - 44.385820 | 1700008O03Rik | 3.1E-02           |             | 3.9E-02    | 3.1E-06         |                 |
| Dsm2            | 7          | 44.384102 - 44.400187 | Syt3          | 4.2E-03           |             |            | 1.2E-03         | 2.4E-02         |
| Dsm2            | 7          | 44.429018 - 44.463351 | Lrrc4b        |                   |             |            | 4.1E-02         |                 |
| Dsm2            | 7          | 44.467980 - 44.471652 | Josd2         | 2.7E-02           |             | 4.4E-02    | 5.0E-03         | 8.0E-03         |
| Dsm2            | 7          | 44.489937 - 44.496529 | 2310044H10Rik | 6.7E-04           |             |            | 1.1E-02         | 2.0E-05         |
| Dsm2            | 7          | 44.549616 - 44.553951 | Nr1h2         | 4.1E-02           |             |            |                 |                 |
| Dsm2            | 7          | 44.590664 - 44.604754 | Kcnc3         |                   |             |            | 1.0E-14         | 1.0E-14         |
| Dsm2            | 7          | 44.605803 - 44.670843 | Myh14         | 4.6E-02           | 2.7E-02     | 4.1E-02    | 2.1E-02         |                 |
| Dsm2            | 7          | 44.812257 - 44.816658 | Atf5          | 2.9E-03           |             |            |                 |                 |
| Dsm2            | 7          | 44.816370 - 44.840809 | Il4i1         | 2.1E-04           |             |            |                 |                 |
| Dsm2            | 7          | 44.840901 - 44.849079 | Tbc1d17       | 3.7E-02           |             |            |                 | 4.5E-02         |
| Dsm2            | 7          | 44.848991 - 44.855421 | Akt1s1        | 2.6E-03           |             | 3.4E-03    | 3.5E-05         |                 |
| Dsm2            | 7          | 44.863068 - 44.869788 | Ptov1         | 2.3E-02           |             | 2.9E-02    | 1.7E-03         | 6.5E-04         |
| Dsm2            | 7          | 44.879391 - 44.892397 | Med25         | 2.1E-02           |             |            |                 | 7.0E-06         |
| Dsm2            | 7          | 44.896079 - 44.902631 | Fuz           | 3.3E-02           |             |            |                 | 4.3E-02         |
| Dsm2            | 7          | 44.900373 - 44.929496 | Ap2a1         |                   |             |            | 1.1E-02         |                 |
| Dsm2            | 7          | 44.975989 - 44.986492 | Prmt1         | 1.6E-02           |             |            | 3.2E-02         | 5.6E-03         |
| Dsm2            | 7          | 45.053613 - 45.062677 | Prrg2         | 3.5E-02           |             | 4.4E-02    | 1.0E-06         | 1.4E-02         |
| Dsm2            | 7          | 45.062429 - 45.078503 | Nosip         |                   |             |            | 2.8E-02         | 5.1E-04         |
| Dsm2            | 7          | 45.125558 - 45.136231 | Rpl13a        | 4.2E-02           |             |            |                 |                 |
| Dsm2            | 7          | 45.131188 - 45.136432 | Flt3l         | 9.1E-03           |             |            |                 |                 |
| Dsm2            | 7          | 45.140684 - 45.154584 | Aldh16a1      | 4.6E-02           |             |            | 1.8E-03         | 6.3E-03         |
| Dsm2            | 7          | 45.303155 - 45.333780 | Trpm4         | 4.1E-02           |             |            |                 |                 |
| Dsm2            | 7          | 45.339126 - 45.367019 | Ppfia3        | 8.9E-03           |             |            |                 |                 |
| Dsm2            | 7          | 45.366163 - 45.367948 | Mtag2         | 7.6E-05           | 1.1E-04     |            |                 |                 |
| Dsm2            | 7          | 45.418353 - 45.421854 | Lhb           | 3.6E-02           |             | 2.8E-02    | 5.2E-04         | 1.0E-14         |
| Dsm2            | 7          | 45.434844 - 45.456619 | Gys1          | 1.0E-14           |             | 1.0E-14    | 2.4E-02         |                 |

| Interval | Chr | Location (Mb)*        | Gene                 | Transcript | Gene    | TSS     | Promoter | Splicing |
|----------|-----|-----------------------|----------------------|------------|---------|---------|----------|----------|
| Dsm2     | 7   | 45.457944 - 45.459884 | <i>Ftl1</i>          |            |         |         |          | 5.3E-03  |
| Dsm2     | 7   | 45.472956 - 45.488805 | <i>Dhdh</i>          |            |         |         | 2.8E-02  |          |
| Dsm2     | 7   | 45.486262 - 45.523632 | <i>Tulp2</i>         |            |         |         |          | 9.3E-03  |
| Dsm2     | 7   | 45.492874 - 45.510406 | <i>Nucb1</i>         |            |         |         | 3.5E-02  | 1.2E-02  |
| Dsm2     | 7   | 45.699843 - 45.704682 | <i>Car11</i>         | 2.5E-02    | 7.9E-03 | 3.1E-02 | 1.5E-02  |          |
| Dsm2     | 7   | 45.705088 - 45.710155 | <i>Dbp</i>           | 3.5E-02    | 2.7E-02 |         | 1.2E-02  |          |
| Dsm2     | 7   | 45.715457 - 45.720835 | <i>Rpl18</i>         |            |         |         | 4.8E-02  |          |
| Dsm2     | 7   | 45.783738 - 45.804144 | <i>Lmtk3</i>         | 2.8E-03    |         | 5.1E-03 | 3.4E-02  |          |
| Dsm2     | 7   | 45.806637 - 45.814581 | <i>Cyth2</i>         | 3.1E-02    |         |         | 1.0E-14  | 1.0E-14  |
| Dsm2     | 7   | 46.098725 - 46.099897 | <i>Kcnj11</i>        | 2.7E-02    |         |         |          |          |
| Dsm2     | 7   | 46.443168 - 46.639807 | <i>Sergef</i>        | 3.4E-02    |         |         |          |          |
| Dsm2     | 7   | 46.796103 - 46.823800 | <i>Gtf2h1</i>        | 1.1E-05    |         |         |          |          |
| Dsm2     | 7   | 46.841475 - 46.855627 | <i>Ldha</i>          |            |         |         | 3.4E-03  |          |
| Dsm2     | 7   | 47.077798 - 47.133684 | <i>Ptpn5</i>         | 4.7E-03    |         | 3.2E-02 | 3.0E-04  | 8.7E-03  |
| Dsm2     | 7   | 49.246189 - 49.610087 | <i>Nav2</i>          | 1.4E-06    |         |         | 4.5E-06  | 2.2E-06  |
| Dsm2     | 7   | 49.778346 - 49.858265 | <i>Prmt3</i>         | 4.1E-02    |         |         |          | 1.0E-06  |
| Dsm2     | 7   | 49.974864 - 50.865255 | <i>Nell1</i>         | 8.9E-03    |         |         |          |          |
| Dsm2     | 7   | 55.794148 - 55.831447 | <i>Tubgcp5</i>       | 8.0E-03    |         |         |          |          |
| Dsm2     | 7   | 55.841745 - 55.930700 | <i>Cyfp1</i>         | 1.9E-02    |         |         |          | 5.5E-04  |
| Dsm2     | 7   | 55.931287 - 55.962476 | <i>Nipa2</i>         | 4.5E-02    |         |         | 1.0E-14  | 4.7E-14  |
| Dsm2     | 7   | 56.050155 - 56.231794 | <i>Herc2</i>         | 4.1E-03    |         | 8.1E-04 |          |          |
| Dsm2     | 7   | 56.716465 - 57.387188 | <i>Gabrg3</i>        |            |         |         | 2.2E-04  |          |
| Dsm2     | 7   | 57.590518 - 57.828802 | <i>Gabbr3</i>        | 4.7E-02    |         | 2.7E-05 | 1.6E-02  | 7.4E-03  |
| Dsm2     | 7   | 61.930913 - 61.982356 | <i>A330076H08Rik</i> |            |         |         |          | 2.7E-04  |
| Dsm2     | 7   | 62.348277 - 62.349928 | <i>Ndn</i>           | 2.7E-03    | 5.3E-03 |         |          |          |
| Dsm3     | 8   | 54.629055 - 54.887184 | <i>Wdr17</i>         | 4.6E-02    |         | 1.5E-03 | 8.9E-03  | 3.8E-05  |
| Dsm3     | 8   | 54.708987 - 54.710381 | <i>Gm15758</i>       |            |         |         |          | 4.4E-02  |
| Dsm3     | 8   | 54.954728 - 55.060877 | <i>Gpm6a</i>         | 4.7E-09    | 7.1E-09 | 5.8E-09 |          |          |
| Dsm3     | 8   | 57.523828 - 57.653032 | <i>Galnt7</i>        | 4.5E-02    |         |         |          |          |
| Dsm3     | 8   | 60.632827 - 60.676729 | <i>Mfap3l</i>        | 3.2E-02    |         |         |          |          |
| Dsm3     | 8   | 60.890418 - 60.907580 | <i>2700029M09Rik</i> | 4.2E-02    |         |         |          |          |
| Dsm3     | 8   | 60.910389 - 60.983300 | <i>Cln3</i>          | 3.8E-03    |         | 4.1E-02 | 4.7E-10  | 2.8E-05  |
| Dsm3     | 8   | 60.993195 - 61.131346 | <i>Nek1</i>          | 1.3E-03    |         |         |          |          |
| Dsm3     | 8   | 62.951009 - 63.357103 | <i>Spock3</i>        | 2.6E-02    |         |         |          |          |
| Dsm3     | 8   | 64.592558 - 64.693040 | <i>Cpe</i>           | 1.0E-14    | 1.0E-14 | 1.0E-14 |          |          |
| Dsm3     | 8   | 65.617900 - 66.471637 | <i>March1</i>        | 3.7E-03    |         |         |          |          |
| Dsm3     | 8   | 68.356781 - 68.735146 | <i>Csgalnact1</i>    | 8.0E-03    |         |         |          |          |
| Dsm3     | 8   | 68.880491 - 68.907448 | <i>Lpl</i>           | 2.0E-02    | 3.5E-03 | 8.9E-03 |          | 3.6E-02  |
| Dsm3     | 8   | 69.037711 - 69.089235 | <i>Slc18a1</i>       |            |         |         | 8.0E-05  | 9.4E-04  |
| Dsm3     | 8   | 69.088646 - 69.113711 | <i>Atp6v1b2</i>      |            |         |         | 9.4E-03  | 4.1E-03  |
| Dsm3     | 8   | 69.610857 - 69.625548 | <i>Zfp868</i>        | 4.2E-03    |         | 5.6E-03 |          | 4.6E-05  |
| Dsm3     | 8   | 69.761326 - 69.791178 | <i>Zfp866</i>        | 4.0E-03    |         | 7.1E-04 | 2.8E-08  | 1.9E-10  |

| <b>Interval</b> | <b>Chr</b> | <b>Location (Mb)*</b> | <b>Gene</b>          | <b>Transcript</b> | <b>Gene</b> | <b>TSS</b> | <b>Promoter</b> | <b>Splicing</b> |
|-----------------|------------|-----------------------|----------------------|-------------------|-------------|------------|-----------------|-----------------|
| <i>Dsm3</i>     | 8          | 70.083529 - 70.090862 | <i>Hapln4</i>        | 2.6E-03           | 5.1E-03     | 3.4E-03    |                 |                 |
| <i>Dsm3</i>     | 8          | 70.093085 - 70.120873 | <i>Ncan</i>          | 1.8E-02           | 4.0E-02     | 2.4E-02    |                 |                 |
| <i>Dsm3</i>     | 8          | 70.172356 - 70.183681 | <i>Tmem161a</i>      |                   |             |            |                 | 8.2E-03         |
| <i>Dsm3</i>     | 8          | 70.184340 - 70.212305 | <i>Slc25a42</i>      | 2.6E-02           |             |            | 5.0E-02         | 1.5E-02         |
| <i>Dsm3</i>     | 8          | 70.220172 - 70.234466 | <i>Armc6</i>         | 4.0E-02           |             |            | 1.8E-02         | 3.1E-03         |
| <i>Dsm3</i>     | 8          | 70.234226 - 70.279915 | <i>Sugp2</i>         | 1.7E-02           |             | 2.1E-02    | 1.0E-14         | 3.9E-02         |
| <i>Dsm3</i>     | 8          | 70.282827 - 70.294361 | <i>Homer3</i>        | 8.3E-03           |             | 1.1E-02    | 4.4E-03         |                 |
| <i>Dsm3</i>     | 8          | 70.302518 - 70.312993 | <i>Cope</i>          | 4.2E-02           |             |            |                 |                 |
| <i>Dsm3</i>     | 8          | 70.315787 - 70.331587 | <i>Lass1</i>         | 5.2E-03           |             | 6.3E-03    | 2.0E-02         |                 |
| <i>Dsm3</i>     | 8          | 70.382355 - 70.439579 | <i>Crtc1</i>         |                   |             |            |                 | 4.2E-02         |
| <i>Dsm3</i>     | 8          | 70.483876 - 70.487358 | <i>Tmem59l</i>       | 1.6E-02           | 3.4E-02     | 2.0E-02    |                 |                 |
| <i>Dsm3</i>     | 8          | 70.508263 - 70.510801 | <i>Uba52</i>         | 3.4E-02           |             | 2.5E-02    |                 | 1.0E-14         |
| <i>Dsm3</i>     | 8          | 70.508272 - 70.527956 | <i>2810422J05Rik</i> | 3.5E-02           |             | 1.6E-02    | 4.8E-03         | 6.8E-06         |
| <i>Dsm3</i>     | 8          | 70.527724 - 70.535328 | <i>Fkbp8</i>         | 3.0E-02           |             | 9.5E-05    | 1.0E-14         | 1.7E-03         |
| <i>Dsm3</i>     | 8          | 70.597491 - 70.608314 | <i>Ssbp4</i>         | 2.5E-03           | 5.0E-03     | 3.4E-03    |                 |                 |
| <i>Dsm3</i>     | 8          | 70.697739 - 70.700616 | <i>Jund</i>          | 3.9E-02           |             |            |                 |                 |
| <i>Dsm3</i>     | 8          | 70.754679 - 70.758677 | <i>Rab3a</i>         | 1.9E-03           |             |            |                 | 7.5E-04         |
| <i>Dsm3</i>     | 8          | 70.768176 - 70.776713 | <i>Pik3r2</i>        |                   |             |            | 1.8E-02         |                 |
| <i>Dsm3</i>     | 8          | 70.778117 - 70.792433 | <i>Mast3</i>         | 2.9E-02           |             | 3.7E-02    |                 |                 |
| <i>Dsm3</i>     | 8          | 71.248561 - 71.272934 | <i>Haus8</i>         | 3.5E-02           |             |            |                 | 1.6E-02         |
| <i>Dsm3</i>     | 8          | 71.272714 - 71.360712 | <i>Myo9b</i>         | 4.3E-02           |             |            |                 |                 |
| <i>Dsm3</i>     | 8          | 71.366848 - 71.369732 | <i>Use1</i>          | 3.4E-02           |             | 1.0E-07    | 1.0E-14         | 2.1E-02         |
| <i>Dsm3</i>     | 8          | 71.371298 - 71.379361 | <i>Ocell</i>         | 3.4E-02           |             |            | 1.0E-14         | 1.0E-14         |
| <i>Dsm3</i>     | 8          | 71.374123 - 71.381960 | <i>Nr2f6</i>         | 4.3E-02           |             | 3.6E-02    | 1.4E-11         | 1.0E-14         |
| <i>Dsm3</i>     | 8          | 71.469199 - 71.476098 | <i>Ddal</i>          | 4.3E-02           |             |            |                 | 4.3E-07         |
| <i>Dsm3</i>     | 8          | 71.488103 - 71.499583 | <i>Gtpbp3</i>        | 4.1E-02           | 3.9E-02     | 1.5E-02    | 1.1E-03         | 1.0E-14         |
| <i>Dsm3</i>     | 8          | 71.497754 - 71.511769 | <i>Plvap</i>         | 2.0E-03           | 3.9E-03     | 2.7E-03    |                 |                 |
| <i>Dsm3</i>     | 8          | 71.708387 - 71.725716 | <i>Fcho1</i>         | 3.8E-02           | 3.9E-04     | 3.8E-02    | 3.0E-02         | 4.6E-02         |
| <i>Dsm3</i>     | 8          | 72.341001 - 72.421474 | <i>Eps15l1</i>       | 3.3E-02           |             | 4.2E-02    |                 |                 |
| <i>Dsm3</i>     | 8          | 72.480641 - 72.492614 | <i>Slc35e1</i>       | 1.1E-03           |             | 1.4E-03    | 9.9E-03         |                 |
| <i>Dsm3</i>     | 8          | 72.646711 - 72.714746 | <i>Nwd1</i>          |                   |             |            | 2.3E-03         | 3.4E-04         |
| <i>Dsm3</i>     | 8          | 72.723288 - 72.758203 | <i>Sin3b</i>         |                   |             |            |                 | 1.7E-06         |
| <i>Dsm3</i>     | 8          | 75.033686 - 75.070121 | <i>Tom1</i>          | 4.8E-02           |             |            |                 |                 |
| <i>Dsm3</i>     | 8          | 78.804865 - 78.821140 | <i>Lsm6</i>          |                   |             |            |                 | 1.9E-07         |
| <i>Dsm3</i>     | 8          | 79.028437 - 79.193766 | <i>Zfp827</i>        |                   |             |            | 4.7E-02         |                 |
| <i>Dsm3</i>     | 8          | 81.342556 - 82.125036 | <i>Inpp4b</i>        | 1.6E-02           |             |            |                 |                 |
| <i>Dsm3</i>     | 8          | 83.434493 - 83.458391 | <i>Scoc</i>          | 1.5E-06           | 4.0E-02     | 2.0E-06    | 5.5E-11         |                 |
| <i>Dsm3</i>     | 8          | 83.566671 - 83.571626 | <i>Ndufb7</i>        |                   |             |            |                 | 4.6E-03         |
| <i>Dsm3</i>     | 8          | 83.571700 - 83.594491 | <i>Tecr</i>          |                   |             |            |                 | 4.4E-03         |
| <i>Dsm3</i>     | 8          | 83.608175 - 83.611902 | <i>Dnajb1</i>        | 5.6E-03           |             | 7.3E-03    |                 |                 |
| <i>Dsm3</i>     | 8          | 83.666833 - 83.672753 | <i>Ptger1</i>        | 3.4E-02           |             |            |                 | 5.2E-05         |
| <i>Dsm3</i>     | 8          | 83.669762 - 83.699179 | <i>Pkn1</i>          | 7.3E-03           |             | 9.5E-03    | 2.2E-02         |                 |

| <b>Interval</b> | <b>Chr</b> | <b>Location (Mb)*</b> | <b>Gene</b>          | <b>Transcript</b> | <b>Gene</b> | <b>TSS</b> | <b>Promoter</b> | <b>Splicing</b> |
|-----------------|------------|-----------------------|----------------------|-------------------|-------------|------------|-----------------|-----------------|
| <i>Dsm3</i>     | 8          | 83.715177 - 83.726892 | <i>Ddx39</i>         | 1.6E-02           |             |            | 1.6E-03         | 3.6E-02         |
| <i>Dsm3</i>     | 8          | 83.723251 - 83.741326 | <i>Cd97</i>          | 3.4E-02           |             | 3.0E-02    | 3.7E-07         | 3.7E-04         |
| <i>Dsm3</i>     | 8          | 83.900105 - 83.941954 | <i>Lphn1</i>         | 3.3E-02           |             | 4.1E-02    | 1.0E-14         | 1.0E-14         |
| <i>Dsm3</i>     | 8          | 84.388440 - 84.640246 | <i>Cacna1a</i>       | 1.5E-02           |             |            |                 |                 |
| <i>Dsm3</i>     | 8          | 84.686307 - 84.699808 | <i>Trmt1</i>         | 1.7E-02           |             |            |                 | 8.8E-03         |
| <i>Dsm3</i>     | 8          | 84.699876 - 84.800344 | <i>Nfix</i>          |                   |             |            | 3.5E-04         |                 |
| <i>Dsm3</i>     | 8          | 84.815405 - 84.822823 | <i>Dand5</i>         |                   |             |            | 8.5E-03         |                 |
| <i>Dsm3</i>     | 8          | 84.834019 - 84.840665 | <i>Rad23a</i>        | 1.8E-02           |             |            |                 | 6.0E-03         |
| <i>Dsm3</i>     | 8          | 84.841850 - 84.846934 | <i>Calr</i>          | 4.1E-02           |             |            | 2.8E-02         |                 |
| <i>Dsm3</i>     | 8          | 84.856989 - 84.869257 | <i>Farsa</i>         | 1.4E-02           |             |            |                 | 5.4E-09         |
| <i>Dsm3</i>     | 8          | 84.872111 - 84.888221 | <i>Syce2</i>         | 1.3E-02           |             |            | 7.1E-03         | 3.0E-06         |
| <i>Dsm3</i>     | 8          | 84.886393 - 84.893921 | <i>Gcdh</i>          | 5.1E-03           |             |            |                 |                 |
| <i>Dsm3</i>     | 8          | 84.908560 - 84.922915 | <i>Dnase2a</i>       |                   |             |            | 6.8E-03         |                 |
| <i>Dsm3</i>     | 8          | 84.911903 - 84.937359 | <i>Mast1</i>         | 4.8E-02           |             |            | 1.6E-02         | 1.0E-14         |
| <i>Dsm3</i>     | 8          | 84.956610 - 84.969767 | <i>Rnaseh2a</i>      | 3.3E-02           |             | 4.1E-02    | 5.9E-03         |                 |
| <i>Dsm3</i>     | 8          | 84.969587 - 84.974834 | <i>Prdx2</i>         | 4.8E-02           |             | 4.4E-03    | 1.0E-14         | 6.0E-04         |
| <i>Dsm3</i>     | 8          | 85.036915 - 85.057583 | <i>Tnpo2</i>         | 1.5E-02           |             |            |                 |                 |
| <i>Dsm3</i>     | 8          | 85.053160 - 85.060460 | <i>A230103J11Rik</i> | 4.1E-02           |             |            |                 |                 |
| <i>Dsm3</i>     | 8          | 85.060055 - 85.067124 | <i>Fbxw9</i>         | 4.2E-02           |             |            |                 |                 |
| <i>Dsm3</i>     | 8          | 85.071757 - 85.075162 | <i>Dhps</i>          | 1.4E-02           |             | 1.2E-02    | 3.8E-04         | 9.4E-04         |
| <i>Dsm3</i>     | 8          | 85.075035 - 85.081306 | <i>Wdr83</i>         | 2.7E-02           |             | 3.4E-02    | 1.6E-07         | 7.5E-03         |
| <i>Dsm3</i>     | 8          | 85.080740 - 85.082339 | <i>BC056474</i>      | 6.5E-03           |             | 8.4E-03    | 1.5E-13         |                 |
| <i>Dsm3</i>     | 8          | 85.636588 - 85.690973 | <i>Neto2</i>         | 1.5E-03           |             | 1.9E-03    |                 |                 |
| <i>Dsm3</i>     | 8          | 86.841139 - 86.885258 | <i>N4bp1</i>         | 2.6E-02           |             | 3.6E-02    | 2.6E-02         |                 |
| <i>Dsm3</i>     | 8          | 87.468854 - 87.472592 | <i>Cbln1</i>         |                   |             |            | 4.9E-02         |                 |
| <i>Dsm3</i>     | 8          | 87.661810 - 87.959595 | <i>Zfp423</i>        | 4.5E-02           |             |            |                 |                 |
| <i>Dsm3</i>     | 8          | 88.118769 - 88.135110 | <i>Tmem188</i>       | 4.4E-02           |             |            |                 |                 |
| <i>Dsm3</i>     | 8          | 88.137855 - 88.172027 | <i>Heatr3</i>        | 1.6E-02           |             |            |                 |                 |
| <i>Dsm3</i>     | 8          | 88.199213 - 88.259722 | <i>Papd5</i>         | 1.1E-02           |             |            |                 |                 |
| <i>Dsm3</i>     | 8          | 88.331039 - 88.362194 | <i>Brd7</i>          | 1.4E-02           |             | 1.7E-02    | 1.1E-06         |                 |
| <i>Dsm3</i>     | 8          | 88.697028 - 88.751945 | <i>Cyld</i>          | 4.1E-03           |             |            | 4.3E-02         |                 |
| <i>Dsm3</i>     | 8          | 90.828835 - 91.054508 | <i>Chd9</i>          | 2.9E-06           | 4.5E-02     |            |                 |                 |
| <i>Dsm3</i>     | 8          | 91.070057 - 91.123844 | <i>Rbl2</i>          |                   |             |            |                 | 1.0E-02         |
| <i>Dsm3</i>     | 8          | 91.112041 - 91.134465 | <i>Aktip</i>         | 4.0E-02           |             | 1.2E-02    | 1.3E-02         | 3.8E-02         |
| <i>Dsm3</i>     | 8          | 91.313532 - 91.668439 | <i>Fto</i>           |                   |             |            |                 | 2.0E-05         |
| <i>Dsm3</i>     | 8          | 93.809966 - 93.969388 | <i>Gnao1</i>         |                   |             |            | 1.4E-10         | 1.0E-02         |
| <i>Dsm3</i>     | 8          | 94.037198 - 94.067921 | <i>Ogfod1</i>        | 1.8E-02           |             |            |                 |                 |
| <i>Dsm3</i>     | 8          | 94.386438 - 94.395377 | <i>Herpud1</i>       |                   |             |            | 4.9E-02         |                 |
| <i>Dsm3</i>     | 8          | 94.532990 - 94.570529 | <i>Cpne2</i>         | 4.7E-02           |             |            | 7.5E-03         | 7.2E-03         |
| <i>Dsm3</i>     | 8          | 94.674895 - 94.696242 | <i>Pllp</i>          | 1.3E-02           | 2.9E-02     | 1.8E-02    |                 |                 |
| <i>Dsm3</i>     | 8          | 94.819818 - 94.838358 | <i>Ciapi1</i>        | 3.4E-02           |             |            |                 |                 |
| <i>Dsm3</i>     | 8          | 94.838321 - 94.854895 | <i>Coq9</i>          | 4.5E-02           |             |            |                 |                 |

| <b>Interval</b> | <b>Chr</b> | <b>Location (Mb)*</b>   | <b>Gene</b>         | <b>Transcript</b> | <b>Gene</b> | <b>TSS</b> | <b>Promoter</b> | <b>Splicing</b> |
|-----------------|------------|-------------------------|---------------------|-------------------|-------------|------------|-----------------|-----------------|
| <i>Dsm3</i>     | 8          | 95.446096 - 95.488820   | <i>Csnk2a2</i>      |                   |             |            |                 | 4.1E-02         |
| <i>Dsm3</i>     | 8          | 95.676980 - 95.715119   | <i>Ndrp4</i>        | 4.7E-02           |             | 2.6E-02    | 4.3E-05         |                 |
| <i>Dsm3</i>     | 8          | 99.024471 - 99.416471   | <i>Cdh8</i>         | 2.8E-02           |             |            |                 |                 |
| <i>Dsm3</i>     | 8          | 104.511028 - 104.534637 | <i>Nae1</i>         | 2.1E-03           |             | 1.5E-04    | 3.5E-03         | 3.9E-02         |
| <i>Dsm3</i>     | 8          | 104.534700 - 104.550343 | <i>Car7</i>         | 6.5E-04           |             | 8.8E-04    |                 |                 |
| <i>Dsm3</i>     | 8          | 105.698159 - 105.701095 | <i>Acd</i>          | 4.7E-03           |             | 8.5E-04    |                 |                 |
| <i>Dsm3</i>     | 8          | 105.880881 - 105.894908 | <i>Ede4</i>         |                   |             |            |                 | 1.3E-02         |
| <i>Dsm3</i>     | 8          | 105.893567 - 105.895023 | <i>Ede4,Nrn11</i>   |                   | 2.1E-02     |            | 1.0E-14         |                 |
| <i>Dsm3</i>     | 8          | 105.893567 - 105.895023 | <i>Nrn11</i>        | 1.9E-02           |             | 1.9E-06    |                 | 1.2E-04         |
| <i>Dsm3</i>     | 8          | 105.943590 - 105.966115 | <i>Slc12a4</i>      |                   |             |            | 4.7E-02         | 1.3E-03         |
| <i>Dsm3</i>     | 8          | 106.210936 - 106.252794 | <i>Prmt7</i>        | 1.0E-02           |             | 1.3E-02    | 1.3E-02         |                 |
| <i>Dsm3</i>     | 8          | 106.572966 - 106.573461 | <i>Gm10073</i>      | 1.8E-02           | 4.0E-02     |            |                 |                 |
| <i>Dsm3</i>     | 8          | 107.069400 - 107.096547 | <i>Terf2</i>        | 1.5E-02           |             | 1.9E-02    | 1.1E-04         |                 |
| <i>Dsm3</i>     | 8          | 107.293470 - 107.379517 | <i>Nfat5</i>        | 4.1E-02           |             | 3.3E-02    | 1.0E-14         | 1.3E-03         |
| <i>Dsm3</i>     | 8          | 110.142539 - 110.168206 | <i>Calb2</i>        |                   |             |            |                 | 5.4E-04         |
| <i>Dsm3</i>     | 8          | 110.721476 - 110.741400 | <i>Mtss1l</i>       | 3.1E-02           |             | 3.8E-02    | 5.5E-03         |                 |
| <i>Dsm3</i>     | 8          | 110.741829 - 110.805924 | <i>Il34</i>         |                   |             |            |                 | 1.2E-02         |
| <i>Dsm3</i>     | 8          | 110.846600 - 110.882227 | <i>Cog4</i>         | 5.6E-06           |             |            |                 |                 |
| <i>Dsm3</i>     | 8          | 111.033144 - 111.057664 | <i>Aars</i>         |                   |             |            | 3.7E-02         | 4.3E-03         |
| <i>Dsm3</i>     | 8          | 111.345135 - 111.393824 | <i>Fa2h</i>         | 1.7E-02           |             | 2.1E-02    |                 |                 |
| <i>Dsm3</i>     | 8          | 111.710485 - 111.743849 | <i>Bcar1</i>        | 3.3E-04           |             | 4.3E-04    | 1.1E-02         |                 |
| <i>Dsm5</i>     | 11         | 7.063489 - 7.178506     | <i>Adcy1</i>        | 8.9E-03           | 1.0E-14     | 1.1E-02    |                 |                 |
| <i>Dsm5</i>     | 11         | 11.930508 - 12.038683   | <i>Grb10</i>        | 3.9E-02           |             | 4.8E-02    | 1.0E-14         | 1.0E-14         |
| <i>Dsm5</i>     | 11         | 12.236608 - 12.464960   | <i>Cobl</i>         | 6.5E-06           |             | 8.9E-06    | 6.1E-06         |                 |
| <i>Dsm5</i>     | 11         | 16.971206 - 17.052381   | <i>Plek</i>         | 4.9E-02           |             |            | 1.7E-02         |                 |
| <i>Dsm5</i>     | 11         | 17.159263 - 17.200375   | <i>Ppp3r1,Wdr92</i> |                   |             |            | 2.1E-03         |                 |
| <i>Dsm5</i>     | 11         | 17.203198 - 17.211568   | <i>Pno1</i>         | 8.9E-03           |             | 1.1E-02    | 4.2E-05         |                 |
| <i>Dsm5</i>     | 11         | 17.257579 - 17.269176   | <i>C1d</i>          |                   |             |            | 4.9E-02         |                 |
| <i>Dsm5</i>     | 11         | 20.062304 - 20.112913   | <i>Actr2</i>        |                   |             |            |                 | 5.3E-03         |
| <i>Dsm5</i>     | 11         | 20.201432 - 20.226856   | <i>Rab1</i>         | 2.5E-03           |             |            |                 |                 |
| <i>Dsm5</i>     | 11         | 21.091291 - 21.150323   | <i>Peli1</i>        | 5.7E-04           |             |            |                 |                 |
| <i>Dsm5</i>     | 11         | 21.239281 - 21.321136   | <i>Vps54</i>        | 1.8E-02           |             |            |                 |                 |
| <i>Dsm5</i>     | 11         | 21.321138 - 21.371201   | <i>Ugp2</i>         | 1.1E-02           |             |            |                 |                 |
| <i>Dsm5</i>     | 11         | 21.556787 - 21.572367   | <i>Mdh1</i>         | 5.6E-03           |             |            |                 |                 |
| <i>Dsm5</i>     | 11         | 22.005828 - 22.342292   | <i>Ehbp1</i>        |                   |             |            | 1.1E-02         |                 |
| <i>Dsm5</i>     | 11         | 22.834744 - 22.982382   | <i>Commd1</i>       | 3.8E-03           |             |            |                 |                 |
| <i>Dsm5</i>     | 11         | 22.834747 - 22.860961   | <i>B3gnt2</i>       | 4.4E-02           |             |            |                 |                 |
| <i>Dsm5</i>     | 11         | 23.306895 - 23.490560   | <i>Usp34</i>        | 3.5E-02           |             |            |                 |                 |
| <i>Dsm5</i>     | 11         | 23.646479 - 23.665959   | <i>Pex13</i>        |                   |             |            |                 | 3.4E-02         |
| <i>Dsm5</i>     | 11         | 23.665674 - 23.732876   | <i>Pus10</i>        | 6.6E-03           |             | 8.6E-03    | 1.0E-03         |                 |
| <i>Dsm5</i>     | 11         | 24.078056 - 24.174123   | <i>Bcl11a</i>       |                   |             |            | 3.0E-02         | 2.7E-02         |
| <i>Dsm5</i>     | 11         | 28.385685 - 28.584324   | <i>Ccdc85a</i>      | 1.4E-02           |             | 7.0E-03    | 3.1E-03         | 3.9E-04         |

| <b>Interval</b> | <b>Chr</b> | <b>Location (Mb)*</b> | <b>Gene</b>     | <b>Transcript</b> | <b>Gene</b> | <b>TSS</b> | <b>Promoter</b> | <b>Splicing</b> |
|-----------------|------------|-----------------------|-----------------|-------------------|-------------|------------|-----------------|-----------------|
| Dsm5            | 11         | 29.130744 - 29.161828 | <i>Pnpt1</i>    | 3.6E-02           |             | 4.4E-02    |                 | 1.8E-02         |
| Dsm5            | 11         | 29.172890 - 29.220797 | <i>Smek2</i>    | 1.1E-03           |             | 1.5E-03    | 4.8E-03         |                 |
| Dsm5            | 11         | 29.221532 - 29.247409 | <i>Ccdc104</i>  | 4.3E-02           |             | 3.9E-03    | 4.1E-02         | 4.9E-02         |
| Dsm5            | 11         | 29.526408 - 29.545279 | <i>Mtif2</i>    | 1.8E-02           |             |            |                 | 4.1E-02         |
| Dsm5            | 11         | 29.692947 - 29.744331 | <i>Rtn4</i>     | 1.7E-02           |             |            |                 |                 |
| Dsm5            | 11         | 30.099395 - 30.268175 | <i>Spnb2</i>    |                   |             |            | 4.3E-02         |                 |
| Dsm5            | 11         | 30.930774 - 30.954335 | <i>Erlec1</i>   |                   |             |            |                 | 3.3E-02         |
| Dsm5            | 11         | 31.872211 - 31.935634 | <i>Cpeb4</i>    | 3.6E-02           |             |            |                 | 2.8E-02         |
| Dsm5            | 11         | 32.225628 - 32.267707 | <i>Nprl3</i>    | 3.7E-02           |             | 3.4E-02    | 4.2E-02         | 8.4E-03         |
| Dsm5            | 11         | 32.283511 - 32.284465 | <i>Hba-a1</i>   | 1.1E-02           | 6.6E-03     | 1.4E-02    | 9.0E-03         |                 |
| Dsm5            | 11         | 32.296489 - 32.297298 | <i>Hba-a2</i>   | 8.9E-03           | 1.8E-02     | 1.2E-02    |                 |                 |
| Dsm5            | 11         | 32.642724 - 32.746816 | <i>Fbxw11</i>   | 4.6E-02           |             |            |                 |                 |
| Dsm5            | 11         | 33.152287 - 33.163206 | <i>Npm1</i>     |                   |             |            |                 | 6.5E-03         |
| Dsm5            | 11         | 33.629339 - 33.993152 | <i>Kcnip1</i>   | 3.8E-02           | 5.9E-09     |            |                 |                 |
| Dsm5            | 11         | 34.046920 - 34.092295 | <i>Lcp2</i>     | 4.0E-05           |             |            |                 |                 |
| Dsm5            | 11         | 35.808381 - 35.834506 | <i>Rars</i>     | 1.1E-04           |             | 1.5E-04    | 5.1E-07         |                 |
| Dsm5            | 11         | 35.838400 - 35.980527 | <i>Wwc1</i>     | 1.7E-02           |             | 2.2E-02    | 1.3E-06         |                 |
| Dsm5            | 11         | 36.006656 - 37.235964 | <i>Odz2</i>     | 4.7E-03           |             |            |                 |                 |
| Dsm5            | 11         | 40.679314 - 40.695203 | <i>Mat2b</i>    | 2.3E-02           |             |            |                 |                 |
| Dsm5            | 11         | 40.748552 - 40.755311 | <i>Ccng1</i>    | 3.3E-02           |             | 4.1E-02    |                 |                 |
| Dsm5            | 11         | 42.306437 - 42.321072 | <i>Gabra6</i>   | 3.4E-03           | 1.5E-02     | 9.0E-03    |                 | 7.2E-04         |
| Dsm5            | 11         | 42.419757 - 42.629028 | <i>Gabrb2</i>   | 1.4E-02           |             |            |                 | 3.2E-04         |
| Dsm5            | 11         | 43.729512 - 43.748008 | <i>Tic1</i>     |                   |             |            |                 | 2.7E-02         |
| Dsm5            | 11         | 44.454571 - 44.470498 | <i>Ublcp1</i>   | 1.8E-02           | 4.4E-02     | 2.3E-02    | 9.1E-05         |                 |
| Dsm5            | 11         | 44.518964 - 44.565520 | <i>Rnfl45</i>   | 4.5E-02           |             |            |                 |                 |
| Dsm5            | 11         | 45.928269 - 45.944935 | <i>Lsm11</i>    |                   |             |            |                 | 2.4E-02         |
| Dsm5            | 11         | 46.055992 - 46.147343 | <i>Adam19</i>   | 3.9E-02           |             |            |                 | 2.4E-02         |
| Dsm5            | 11         | 46.193850 - 46.312859 | <i>Cyfp2</i>    | 1.8E-05           |             |            |                 |                 |
| Dsm5            | 11         | 48.800332 - 48.806434 | <i>Gnb2l1</i>   |                   |             |            | 4.4E-04         |                 |
| Dsm5            | 11         | 48.806404 - 48.817353 | <i>Trim41</i>   | 2.3E-02           |             | 2.6E-02    | 2.6E-02         |                 |
| Dsm5            | 11         | 49.076587 - 49.096974 | <i>Ifi47</i>    | 9.1E-03           |             |            |                 |                 |
| Dsm5            | 11         | 49.203292 - 49.218816 | <i>Zfp62</i>    | 2.3E-02           |             |            | 3.7E-02         | 3.3E-02         |
| Dsm5            | 11         | 49.244191 - 49.263030 | <i>Mgat1</i>    | 1.4E-02           |             |            | 3.6E-02         | 2.4E-02         |
| Dsm5            | 11         | 49.846751 - 49.886421 | <i>Mapk9</i>    |                   |             |            | 5.0E-02         |                 |
| Dsm5            | 11         | 50.131396 - 50.172785 | <i>Tbc1d9b</i>  | 2.1E-02           |             |            | 1.0E-02         | 4.6E-02         |
| Dsm5            | 11         | 50.199366 - 50.210827 | <i>Sqstm1</i>   | 3.7E-02           |             | 7.6E-05    | 1.8E-02         | 1.9E-02         |
| Dsm5            | 11         | 50.210890 - 50.235103 | <i>Mgat4b</i>   | 9.4E-03           |             | 1.2E-02    | 3.9E-05         |                 |
| Dsm5            | 11         | 50.293961 - 50.325673 | <i>Canx</i>     | 3.2E-02           |             | 3.8E-02    | 2.4E-02         |                 |
| Dsm5            | 11         | 50.376990 - 50.386528 | <i>Hnrnp1</i>   | 3.9E-02           |             | 4.9E-02    |                 | 4.3E-03         |
| Dsm5            | 11         | 50.811086 - 50.827724 | <i>Zfp354c</i>  |                   |             |            |                 | 2.1E-02         |
| Dsm5            | 11         | 51.253651 - 51.263046 | <i>BC049762</i> | 4.1E-02           | 2.5E-03     | 1.7E-03    |                 | 1.1E-05         |
| Dsm5            | 11         | 51.261730 - 51.281766 | <i>Clk4</i>     | 2.5E-02           |             |            |                 | 1.2E-02         |



| <b>Interval</b> | <b>Chr</b> | <b>Location (Mb)*</b> | <b>Gene</b>    | <b>Transcript</b> | <b>Gene</b> | <b>TSS</b> | <b>Promoter</b> | <b>Splicing</b> |
|-----------------|------------|-----------------------|----------------|-------------------|-------------|------------|-----------------|-----------------|
| <i>Dsm5</i>     | 11         | 51.584757 - 51.604489 | <i>Agxt2l2</i> |                   |             |            |                 | 4.5E-02         |
| <i>Dsm5</i>     | 11         | 51.623671 - 51.635896 | <i>Rmnd5b</i>  | 6.7E-07           |             | 8.5E-07    | 1.6E-02         |                 |
| <i>Dsm5</i>     | 11         | 51.692264 - 51.763634 | <i>Sec24a</i>  | 9.5E-03           |             |            |                 |                 |
| <i>Dsm5</i>     | 11         | 51.813455 - 51.857653 | <i>Phf15</i>   | 1.6E-02           | 9.6E-03     | 4.8E-02    |                 |                 |
| <i>Dsm5</i>     | 11         | 52.004221 - 52.089784 | <i>Cdkl3</i>   | 3.5E-02           |             |            |                 |                 |
| <i>Dsm5</i>     | 11         | 52.038850 - 52.039471 | <i>Gm12205</i> | 2.2E-08           | 1.6E-08     |            |                 |                 |
| <i>Dsm5</i>     | 11         | 52.231995 - 52.246858 | <i>Skp1a</i>   | 9.6E-03           |             |            |                 |                 |
| <i>Dsm5</i>     | 11         | 53.259814 - 53.300457 | <i>Hspa4</i>   | 4.6E-03           | 4.2E-02     | 6.1E-03    | 6.7E-09         |                 |
| <i>Dsm5</i>     | 11         | 53.519257 - 53.549565 | <i>Sept8</i>   | 1.4E-02           |             | 1.2E-02    | 2.4E-07         | 3.1E-02         |
| <i>Dsm5</i>     | 11         | 53.567379 - 53.601967 | <i>Kif3a</i>   | 2.0E-02           |             | 2.6E-02    | 9.0E-04         |                 |
| <i>Dsm5</i>     | 11         | 53.602982 - 53.618669 | <i>Il4</i>     |                   |             |            | 4.5E-05         |                 |
| <i>Dsm5</i>     | 11         | 53.983123 - 54.028090 | <i>Slc22a4</i> |                   |             |            | 1.7E-02         |                 |
| <i>Dsm5</i>     | 11         | 54.303798 - 54.364756 | <i>Acsf6</i>   | 3.8E-02           |             | 1.5E-03    | 3.5E-02         | 2.2E-02         |
| <i>Dsm5</i>     | 11         | 54.522847 - 54.699285 | <i>Rapgef6</i> | 7.1E-03           |             |            | 2.1E-05         | 1.0E-14         |
| <i>Dsm5</i>     | 11         | 54.902453 - 54.910377 | <i>Gpx3</i>    | 7.3E-03           | 2.2E-03     | 9.3E-03    |                 |                 |
| <i>Dsm5</i>     | 11         | 54.910785 - 54.962917 | <i>Tnip1</i>   | 4.1E-03           |             |            |                 |                 |
| <i>Dsm5</i>     | 11         | 54.979108 - 55.033445 | <i>Anxa6</i>   | 4.1E-12           |             |            |                 | 4.2E-03         |
| <i>Dsm5</i>     | 11         | 55.394500 - 55.420080 | <i>Sparc</i>   | 2.1E-03           | 2.9E-04     | 2.8E-03    | 1.0E-14         | 7.2E-10         |

\*GRC m38 assembly

**Supplementary Table S4.** Missense variants in *Dsm* intervals and the predicted impact on protein function.

| <b>Interval</b> | <b>Chr</b> | <b>Location (Mb)*</b> | <b>Gene</b>          | <b>Amino acid change</b> | <b>Codon change</b> | <b>RS #</b> | <b>SIFT<sup>†</sup></b> |
|-----------------|------------|-----------------------|----------------------|--------------------------|---------------------|-------------|-------------------------|
| <i>Dsm4</i>     | 5          | 14521070              | <i>Pclo</i>          | D/E                      | gaT/gaA             | novel       | Tolerated               |
| <i>Dsm4</i>     | 5          | 16120781              | <i>Hgf</i>           | R/H                      | cGc/cAc             | rs45644218  | Tolerated               |
| <i>Dsm4</i>     | 5          | 19571437              | <i>Magi2</i>         | E/D                      | gaG/gaC             | rs33653085  | Tolerated               |
| <i>Dsm4</i>     | 5          | 20692271              | <i>Pion</i>          | R/G                      | Aga/Gga             | rs46927900  | Tolerated               |
| <i>Dsm4</i>     | 5          | 20881134              | <i>Fgl2</i>          | A/T                      | Gcc/Acc             | rs33636152  | Tolerated               |
| <i>Dsm4</i>     | 5          | 21262249              | <i>Pmpcb</i>         | S/T                      | aGt/aCt             | rs31979572  | Tolerated               |
| <i>Dsm4</i>     | 5          | 23003987              | <i>Mll5</i>          | M/L                      | Atg/Ctg             | rs29723731  | Tolerated               |
| <i>Dsm4</i>     | 5          | 23293676              | <i>Rint1</i>         | D/E                      | gaT/gaG             | rs32064947  | Tolerated               |
| <i>Dsm4</i>     | 5          | 23472208              | <i>Fam126a</i>       | I/V                      | Atc/Gtc             | rs32047053  | nd                      |
| <i>Dsm4</i>     | 5          | 23683839              | <i>Nupl2</i>         | V/I                      | Gta/Ata             | rs29820223  | Tolerated               |
| <i>Dsm4</i>     | 5          | 23837846              | <i>Kcnh2</i>         | R/H                      | cGc/cAc             | rs29526580  | Tolerated               |
| <i>Dsm4</i>     | 5          | 23909481              | <i>Abcb8</i>         | Q/R                      | cAa/cGa             | rs33062222  | nd                      |
| <i>Dsm4</i>     | 5          | 24002574              | <i>Agap3</i>         | T/A                      | Aca/Gca             | rs50956984  | Tolerated               |
| <i>Dsm4</i>     | 5          | 24213641              | <i>Nub1</i>          | N/S                      | aAt/aGt             | rs13462984  | Tolerated               |
| <i>Dsm4</i>     | 5          | 24414206              | <i>Prkag2</i>        | V/A                      | gTg/gCg             | novel       | Tolerated               |
| <i>Dsm4</i>     | 5          | 24503481              | <i>1500035N22Rik</i> | G/A                      | gGa/gCa             | rs48167035  | nd                      |
| <i>Dsm4</i>     | 5          | 24815889              | <i>Mll3</i>          | D/N                      | Gat/Aat             | rs36787383  | Tolerated               |
| <i>Dsm4</i>     | 5          | 30686351              | <i>Otof</i>          | S/L                      | tCa/tTa             | rs50888259  | Tolerated               |
| <i>Dsm4</i>     | 5          | 31236142              | <i>Cgrefl</i>        | S/G                      | Agc/Ggc             | rs48261697  | Tolerated               |
| <i>Dsm4</i>     | 5          | 31829984              | <i>Slc4a1ap</i>      | P/L                      | cCc/cTc             | novel       | Affect protein function |
| <i>Dsm4</i>     | 5          | 31950225              | <i>Rbks</i>          | M/L                      | Atg/Ttg             | rs13466148  | Affect protein function |
| <i>Dsm4</i>     | 5          | 33163358              | <i>Prl14l</i>        | A/T                      | Gct/Act             | rs32525128  | Tolerated               |
| <i>Dsm4</i>     | 5          | 33163358              | <i>Gm20671</i>       | A/T                      | Gct/Act             | rs32525128  | Affect protein function |
| <i>Dsm4</i>     | 5          | 33289343              | <i>Depdc5</i>        | A/S                      | Gca/Tca             | rs46971248  | Tolerated               |
| <i>Dsm4</i>     | 5          | 42199995              | <i>Bod11</i>         | K/N                      | aaA/aaT             | rs38590808  | Tolerated               |
| <i>Dsm1</i>     | 5          | 51854559              | <i>Ppargc1a</i>      | R/H                      | cGc/cAc             | rs33152841  | Tolerated               |
| <i>Dsm1</i>     | 5          | 52759260              | <i>Sod3</i>          | N/D                      | Aat/Gat             | rs38336994  | Tolerated               |
| <i>Dsm1</i>     | 5          | 52766635              | <i>Ccdc149</i>       | I/S                      | aTc/aGc             | rs29686132  | nd                      |
| <i>Dsm1</i>     | 5          | 53047499              | <i>Sepsecs</i>       | E/D                      | gaG/gaT             | rs13478254  | Tolerated               |
| <i>Dsm1</i>     | 5          | 53507595              | <i>Sel1l3</i>        | R/L                      | cGg/cTg             | novel       | nd                      |
| <i>Dsm1</i>     | 5          | 64191768              | <i>3110047P20Rik</i> | I/V                      | Atc/Gtc             | rs47172680  | Tolerated               |
| <i>Dsm1</i>     | 5          | 64289838              | <i>0610040J01Rik</i> | L/Q                      | cTg/cAg             | rs13459170  | Tolerated               |
| <i>Dsm1</i>     | 5          | 64501811              | <i>Pgm1</i>          | C/S                      | Tgt/Agt             | rs13460885  | Tolerated               |
| <i>Dsm1</i>     | 5          | 67655613              | <i>Tmem33</i>        | A/V                      | gCg/gTg             | rs29520321  | Tolerated               |
| <i>Dsm1</i>     | 5          | 67715913              | <i>Slc30a9</i>       | V/A                      | gTa/gCa             | rs29548855  | Tolerated               |
| <i>Dsm1</i>     | 5          | 73456565              | <i>Fryl</i>          | G/S                      | Ggt/Agt             | rs33085471  | Tolerated               |
| <i>Dsm1</i>     | 5          | 73612295              | <i>Fryl</i>          | L/V                      | Ctc/Gtc             | rs29683841  | nd                      |
| <i>Dsm1</i>     | 5          | 76005459              | <i>Kit</i>           | A/T                      | Gct/Act             | rs33129397  | Tolerated               |
| <i>Dsm1</i>     | 5          | 76576814              | <i>Srd5a3</i>        | S/G                      | Agt/Ggt             | rs31545379  | Tolerated               |
| <i>Dsm4</i>     | 5          | 82223562              | <i>Lphn3</i>         | S/N                      | aGc/aAc             | rs29679877  | Tolerated               |
| <i>Dsm4</i>     | 5          | 84510178              | <i>Epha5</i>         | S/A                      | Tcc/Gcc             | rs47415520  | Tolerated               |

| <b>Interval</b> | <b>Chr</b> | <b>Location (Mb)*</b> | <b>Gene</b>     | <b>Amino acid change</b> | <b>Codon change</b> | <b>RS #</b> | <b>SIFT<sup>†</sup></b> |
|-----------------|------------|-----------------------|-----------------|--------------------------|---------------------|-------------|-------------------------|
| <i>Dsm4</i>     | 5          | 86445366              | <i>Cenpc1</i>   | R/Q                      | cGa/cAa             | rs29680970  | Tolerated               |
| <i>Dsm4</i>     | 5          | 86547138              | <i>Uba6</i>     | N/K                      | aaC/aaG             | rs31659821  | Tolerated               |
| <i>Dsm4</i>     | 5          | 88984370              | <i>Utp3</i>     | L/F                      | ttA/ttT             | rs48286746  | Tolerated               |
| <i>Dsm4</i>     | 5          | 90150813              | <i>Adamts3</i>  | K/E                      | Aag/Gag             | rs37094279  | Tolerated               |
| <i>Dsm4</i>     | 5          | 90646607              | <i>Cox18</i>    | Y/H                      | Tat/Cat             | rs31692127  | Tolerated               |
| <i>Dsm4</i>     | 5          | 90673283              | <i>Ankrd17</i>  | P/L                      | cCt/cTt             | novel       | nd                      |
| <i>Dsm4</i>     | 5          | 92437113              | <i>Cdkl2</i>    | I/M                      | atA/atG             | rs31762832  | nd                      |
| <i>Dsm4</i>     | 5          | 92701496              | <i>Naaa</i>     | N/D                      | Aac/Gac             | rs13469647  | Tolerated               |
| <i>Dsm4</i>     | 5          | 92717499              | <i>Sdad1</i>    | E/D                      | gaG/gaC             | rs49130682  | nd                      |
| <i>Dsm4</i>     | 5          | 92934327              | <i>Scarb2</i>   | R/K                      | aGa/aAa             | rs33625832  | Tolerated               |
| <i>Dsm4</i>     | 5          | 93472539              | <i>Sowahb</i>   | G/E                      | gGa/gAa             | novel       | Tolerated               |
| <i>Dsm4</i>     | 5          | 93616823              | <i>Ccni</i>     | A/T                      | Gct/Act             | rs13460092  | Tolerated               |
| <i>Dsm4</i>     | 5          | 96693225              | <i>Mrpl1</i>    | F/L                      | Ttt/Ctt             | rs33633475  | Affect protein function |
| <i>Dsm4</i>     | 5          | 97025853              | <i>Fras1</i>    | S/T                      | aGc/aCc             | rs31848775  | Tolerated               |
| <i>Dsm4</i>     | 5          | 97241927              | <i>Anxa3</i>    | V/A                      | gTc/gCc             | rs48568871  | Tolerated               |
| <i>Dsm4</i>     | 5          | 97516151              | <i>Bmp2k</i>    | T/A                      | Acg/Gcg             | rs13478405  | Tolerated               |
| <i>Dsm4</i>     | 5          | 100488240             | <i>Enoph1</i>   | V/I                      | Gtc/Atc             | rs13460000  | Tolerated               |
| <i>Dsm4</i>     | 5          | 103342229             | <i>Mapk10</i>   | A/V                      | gCg/gTg             | rs36844177  | Affect protein function |
| <i>Dsm4</i>     | 5          | 104315113             | <i>Klhl8</i>    | R/Q                      | cGg/cAg             | rs32028849  | Affect protein function |
| <i>Dsm4</i>     | 5          | 104521979             | <i>Sparcl1</i>  | D/E                      | gaC/gaA             | rs33257002  | Tolerated               |
| <i>Dsm2</i>     | 7          | 17046685              | <i>Npas1</i>    | L/V                      | Ctg/Gtg             | rs6295100   | Tolerated               |
| <i>Dsm2</i>     | 7          | 17617013              | <i>Hif3a</i>    | T/P                      | Act/Cct             | rs49533089  | nd                      |
| <i>Dsm2</i>     | 7          | 19677802              | <i>Dmpk</i>     | Y/*                      | taT/taG             | rs46709471  | nd                      |
| <i>Dsm2</i>     | 7          | 20099779              | <i>Trappc6a</i> | L/R                      | cTg/cGg             | rs13474030  | Tolerated               |
| <i>Dsm2</i>     | 7          | 38885640              | <i>Ccne1</i>    | H/Q                      | caT/caG             | rs32379441  | Tolerated               |
| <i>Dsm2</i>     | 7          | 53088863              | <i>Grin2d</i>   | A/T                      | Gcc/Acc             | novel       | Tolerated               |
| <i>Dsm2</i>     | 7          | 53171613              | <i>Tmem143</i>  | R/L                      | cGg/cTg             | rs51175460  | Tolerated               |
| <i>Dsm2</i>     | 7          | 52113855              | <i>Pnkp</i>     | Q/H                      | caG/caT             | novel       | Tolerated               |
| <i>Dsm2</i>     | 7          | 20345737              | <i>Bcam</i>     | V/A                      | gTg/gCg             | rs31944997  | Tolerated               |
| <i>Dsm2</i>     | 7          | 20300394              | <i>Tomm40</i>   | E/D                      | gaA/gaC             | rs32423207  | Tolerated               |
| <i>Dsm2</i>     | 7          | 20281675              | <i>ApoE</i>     | S/P                      | Tca/Cca             | rs32422502  | Tolerated               |
| <i>Dsm2</i>     | 7          | 17613093              | <i>Ppp5c</i>    | T/A                      | Act/Gct             | rs13469893  | Tolerated               |
| <i>Dsm2</i>     | 7          | 52997630              | <i>Sult2b1</i>  | G/E                      | gGa/gAa             | rs46169639  | nd                      |
| <i>Dsm2</i>     | 7          | 19938049              | <i>Ercc1</i>    | P/R                      | cCt/cGt             | rs48117413  | nd                      |
| <i>Dsm2</i>     | 7          | 28028384              | <i>Adck4</i>    | C/R                      | Tgc/Cgc             | rs13460395  | Tolerated               |
| <i>Dsm2</i>     | 7          | 16784313              | <i>Dhx34</i>    | P/S                      | Ccc/Tcc             | rs50034019  | Tolerated               |
| <i>Dsm2</i>     | 7          | 31359998              | <i>Wbp7</i>     | Q/R                      | cAa/cGa             | rs3142532   | Tolerated               |
| <i>Dsm2</i>     | 7          | 52226749              | <i>Cpt1c</i>    | F/L                      | Ttc/Ctc             | rs31199207  | Tolerated               |
| <i>Dsm2</i>     | 7          | 52312184              | <i>Prrg2</i>    | R/W                      | Cgg/Tgg             | rs48233868  | Tolerated               |
| <i>Dsm2</i>     | 7          | 28439075              | <i>Ttc9b</i>    | P/S                      | Cct/Tct             | rs51787077  | Tolerated               |
| <i>Dsm2</i>     | 7          | 51748639              | <i>Emc10</i>    | L/S                      | tTg/tCg             | rs46532470  | Tolerated               |
| <i>Dsm2</i>     | 7          | 52108009              | <i>Akt1s1</i>   | Q/R                      | cAg/cGg             | rs13459520  | Tolerated               |

| <b>Interval</b> | <b>Chr</b> | <b>Location (Mb)*</b> | <b>Gene</b>    | <b>Amino acid change</b> | <b>Codon change</b> | <b>RS #</b> | <b>SIFT<sup>†</sup></b> |
|-----------------|------------|-----------------------|----------------|--------------------------|---------------------|-------------|-------------------------|
| <i>Dsm2</i>     | 7          | 30614703              | <i>Zfp790</i>  | H/R                      | cAt/cGt             | rs36638155  | Tolerated               |
| <i>Dsm2</i>     | 7          | 52155551              | <i>Fuz</i>     | M/T                      | aTg/aCg             | rs37767857  | Tolerated               |
| <i>Dsm2</i>     | 7          | 52339036              | <i>Rcn3</i>    | R/Q                      | cGa/cAa             | rs31302575  | Tolerated               |
| <i>Dsm2</i>     | 7          | 37553935              | <i>Tshz3</i>   | I/T                      | aTc/aCc             | rs32135386  | Tolerated               |
| <i>Dsm2</i>     | 7          | 19622040              | <i>Sympk</i>   | V/L                      | Gtg/Ctg             | novel       | Tolerated               |
| <i>Dsm2</i>     | 7          | 66052942              | <i>Atp10a</i>  | E/D                      | gaG/gaT             | rs33010602  | Tolerated               |
| <i>Dsm2</i>     | 7          | 17423076              | <i>Strn4</i>   | D/A                      | gAt/gCt             | rs31961396  | Tolerated               |
| <i>Dsm2</i>     | 7          | 19978806              | <i>Ercc2</i>   | I/V                      | Att/Gtt             | rs52046644  | Tolerated               |
| <i>Dsm2</i>     | 7          | 19846256              | <i>Vasp</i>    | A/T                      | Gca/Aca             | novel       | Tolerated               |
| <i>Dsm2</i>     | 7          | 19678434              | <i>Dmpk</i>    | A/T                      | Gcc/Acc             | novel       | Tolerated               |
| <i>Dsm2</i>     | 7          | 38752419              | <i>C80913</i>  | N/D                      | Aat/Gat             | novel       | Tolerated               |
| <i>Dsm2</i>     | 7          | 39052484              | <i>Pop4</i>    | L/P                      | cTa/cCa             | novel       | nd                      |
| <i>Dsm2</i>     | 7          | 63386662              | <i>Herc2</i>   | G/D                      | gGt/gAt             | rs50155421  | Affect protein function |
| <i>Dsm2</i>     | 7          | 25045210              | <i>Zfp108</i>  | E/G                      | gAg/gGg             | rs38414115  | Tolerated               |
| <i>Dsm2</i>     | 7          | 35971550              | <i>Slc7a10</i> | H/R                      | cAc/cGc             | novel       | Tolerated               |
| <i>Dsm2</i>     | 7          | 57053731              | <i>Prmt3</i>   | V/A                      | gTt/gCt             | rs32892158  | Tolerated               |
| <i>Dsm2</i>     | 7          | 29937670              | <i>Fam98c</i>  | L/V                      | Ctc/Gtc             | rs31011245  | nd                      |
| <i>Dsm2</i>     | 7          | 29965339              | <i>Psm8</i>    | N/S                      | aAc/aGc             | rs13465857  | Tolerated               |
| <i>Dsm2</i>     | 7          | 51646184              | <i>Syt3</i>    | P/L                      | cCg/cTg             | novel       | Tolerated               |
| <i>Dsm2</i>     | 7          | 53252134              | <i>Abcc6</i>   | K/R                      | aAa/aGa             | rs32757904  | Tolerated               |
| <i>Dsm2</i>     | 7          | 53309894              | <i>Nomol</i>   | A/S                      | Gcc/Tcc             | rs48778509  | Tolerated               |
| <i>Dsm2</i>     | 7          | 53698651              | <i>Sergef</i>  | R/G                      | Aga/Gga             | rs32795453  | Tolerated               |
| <i>Dsm2</i>     | 7          | 65067548              | <i>Gabrb3</i>  | R/*                      | Cga/Tga             | rs8269312   | Affect protein function |
| <i>Dsm2</i>     | 7          | 34990915              | <i>Gpi1</i>    | G/R                      | Ggg/Agg             | novel       | Affect protein function |
| <i>Dsm2</i>     | 7          | 31233216              | <i>Kirrel2</i> | E/D                      | gaA/gaT             | rs31589807  | Tolerated               |
| <i>Dsm2</i>     | 7          | 29480032              | <i>Fbxo27</i>  | R/C                      | Cgc/Tgc             | rs31375778  | Tolerated               |
| <i>Dsm2</i>     | 7          | 52263187              | <i>Scaf1</i>   | R/H                      | cGt/cAt             | rs32411905  | Tolerated               |
| <i>Dsm2</i>     | 7          | 51794017              | <i>Pold1</i>   | S/G                      | Agt/Ggt             | rs3719256   | Tolerated               |
| <i>Dsm2</i>     | 7          | 51722089              | <i>Aspdh</i>   | A/V                      | gCt/gTt             | rs30577492  | nd                      |
| <i>Dsm2</i>     | 7          | 57167200              | <i>Slc6a5</i>  | T/A                      | Acg/Gcg             | rs31048165  | Tolerated               |
| <i>Dsm2</i>     | 7          | 53173467              | <i>Emp3</i>    | T/I                      | aCt/aTt             | rs47934871  | Tolerated               |
| <i>Dsm2</i>     | 7          | 28443354              | <i>Map3k10</i> | L/M                      | Ctg/Atg             | rs31866481  | Tolerated               |
| <i>Dsm2</i>     | 7          | 28090525              | <i>Ltbp4</i>   | V/I                      | Gtc/Atc             | rs37849144  | Tolerated               |
| <i>Dsm2</i>     | 7          | 20491139              | <i>Pvr</i>     | S/A                      | Tca/Gca             | rs6341533   | Tolerated               |
| <i>Dsm2</i>     | 7          | 26029737              | <i>Erf</i>     | L/P                      | cTa/cCa             | novel       | Tolerated               |
| <i>Dsm2</i>     | 7          | 19441348              | <i>Mill2</i>   | Q/E                      | Cag/Gag             | rs31011587  | Tolerated               |
| <i>Dsm2</i>     | 7          | 25316847              | <i>Irgq</i>    | P/L                      | cCg/cTg             | rs31824681  | Tolerated               |
| <i>Dsm2</i>     | 7          | 17580300              | <i>Ccdc8</i>   | G/R                      | Ggg/Cgg             | rs47531851  | Tolerated               |
| <i>Dsm2</i>     | 7          | 17545891              | <i>Pnmall1</i> | L/F                      | ttA/ttT             | rs32284680  | Affect protein function |
| <i>Dsm2</i>     | 7          | 17435645              | <i>Prkd2</i>   | S/N                      | aGt/aAt             | novel       | Tolerated               |
| <i>Dsm2</i>     | 7          | 16860667              | <i>Ccdc9</i>   | P/L                      | cCg/cTg             | rs46238417  | nd                      |
| <i>Dsm2</i>     | 7          | 31097313              | <i>Alkbh6</i>  | R/H                      | cGc/cAc             | rs3143488   | Tolerated               |

| <b>Interval</b> | <b>Chr</b> | <b>Location (Mb)*</b> | <b>Gene</b>          | <b>Amino acid change</b> | <b>Codon change</b> | <b>RS #</b> | <b>SIFT<sup>†</sup></b> |
|-----------------|------------|-----------------------|----------------------|--------------------------|---------------------|-------------|-------------------------|
| <i>Dsm2</i>     | 7          | 52897754              | <i>Mamstr</i>        | T/P                      | Act/Cct             | rs32122777  | Tolerated               |
| <i>Dsm2</i>     | 7          | 38264579              | <i>Zfp536</i>        | G/S                      | Ggc/Agc             | rs32041433  | Tolerated               |
| <i>Dsm2</i>     | 7          | 52084270              | <i>Nup62</i>         | G/V                      | gGc/gTc             | rs13475007  | Tolerated               |
| <i>Dsm2</i>     | 7          | 19591025              | <i>Irf2bp1</i>       | S/T                      | Tca/Aca             | rs13461382  | Tolerated               |
| <i>Dsm2</i>     | 7          | 19807925              | <i>Gpr4</i>          | S/F                      | tCt/tTt             | rs31773527  | Tolerated               |
| <i>Dsm2</i>     | 7          | 52891856              | <i>Rasip1</i>        | S/N                      | aGt/aAt             | rs32519373  | nd                      |
| <i>Dsm2</i>     | 7          | 30556399              | <i>Zfp84</i>         | V/M                      | Gtg/Atg             | novel       | Tolerated               |
| <i>Dsm2</i>     | 7          | 26010142              | <i>Zfp526</i>        | T/M                      | aCg/aTg             | rs31912321  | Tolerated               |
| <i>Dsm2</i>     | 7          | 52303204              | <i>Prr12</i>         | S/P                      | Tca/Cca             | rs32068191  | Tolerated               |
| <i>Dsm2</i>     | 7          | 30577496              | <i>Zfp30</i>         | L/P                      | cTt/cCt             | rs31994309  | Tolerated               |
| <i>Dsm2</i>     | 7          | 24925510              | <i>Zfp235</i>        | G/R                      | Gga/Aga             | rs32277497  | Tolerated               |
| <i>Dsm2</i>     | 7          | 19942711              | <i>Cd3eap</i>        | F/L                      | ttC/ttA             | novel       | nd                      |
| <i>Dsm2</i>     | 7          | 17396056              | <i>Fkrp</i>          | N/S                      | aAc/aGc             | rs31558982  | Tolerated               |
| <i>Dsm2</i>     | 7          | 30890057              | <i>Zfp260</i>        | R/K                      | aGa/aAa             | rs31851232  | Tolerated               |
| <i>Dsm2</i>     | 7          | 19721002              | <i>Fbxo46</i>        | T/A                      | Acc/Gcc             | rs32308077  | Tolerated               |
| <i>Dsm2</i>     | 7          | 25076783              | <i>Zfp61</i>         | T/S                      | Act/Tct             | rs108114156 | Tolerated               |
| <i>Dsm2</i>     | 7          | 52713915              | <i>Ftl1</i>          | A/V                      | gCg/gTg             | rs32426657  | Tolerated               |
| <i>Dsm2</i>     | 7          | 30620625              | <i>Zfp940</i>        | T/A                      | Aca/Gca             | rs50868004  | nd                      |
| <i>Dsm2</i>     | 7          | 51756796              | <i>Fam71e1</i>       | R/C                      | Cgt/Tgt             | rs31759732  | nd                      |
| <i>Dsm2</i>     | 7          | 20117187              | <i>Ppp1r37</i>       | P/S                      | Cca/Tca             | rs46235837  | Tolerated               |
| <i>Dsm2</i>     | 7          | 56720197              | <i>Nav2</i>          | D/G                      | gAc/gGc             | rs31226051  | Tolerated               |
| <i>Dsm2</i>     | 7          | 24907292              | <i>Zfp112</i>        | E/K                      | Gag/Aag             | novel       | Tolerated               |
| <i>Dsm2</i>     | 7          | 53082982              | <i>Grwd1</i>         | G/S                      | Ggt/Agt             | novel       | Tolerated               |
| <i>Dsm2</i>     | 7          | 30824171              | <i>Zfp14</i>         | G/E                      | gGa/gAa             | rs31306390  | Tolerated               |
| <i>Dsm2</i>     | 7          | 25059792              | <i>Zfp93</i>         | T/K                      | aCa/aAa             | rs50598724  | Tolerated               |
| <i>Dsm2</i>     | 7          | 28487585              | <i>C030039L03Rik</i> | R/K                      | aGg/aAg             | rs108764696 | Tolerated               |
| <i>Dsm2</i>     | 7          | 24886522              | <i>Zfp180</i>        | M/T                      | aTg/aCg             | rs46156231  | Tolerated               |
| <i>Dsm2</i>     | 7          | 52968731              | <i>Sphk2</i>         | A/V                      | gCg/gTg             | novel       | Tolerated               |
| <i>Dsm2</i>     | 7          | 17149475              | <i>Grlf1</i>         | K/R                      | aAg/aGg             | rs32384591  | Tolerated               |
| <i>Dsm2</i>     | 7          | 30660543              | <i>Zfp420</i>        | E/K                      | Gaa/Aaa             | rs49596855  | Affect protein function |
| <i>Dsm2</i>     | 7          | 30841854              | <i>Zfp82</i>         | V/A                      | gTc/gCc             | rs51511420  | Tolerated               |
| <i>Dsm2</i>     | 7          | 17018228              | <i>Zc3h4</i>         | R/Q                      | cGg/cAg             | rs31143418  | Tolerated               |
| <i>Dsm2</i>     | 7          | 35533200              | <i>Chst8</i>         | R/Q                      | cGa/cAa             | rs31398221  | Affect protein function |
| <i>Dsm2</i>     | 7          | 20170652              | <i>Clasrp</i>        | G/D                      | gGc/gAc             | novel       | Tolerated               |
| <i>Dsm2</i>     | 7          | 53049414              | <i>Lmtk3</i>         | D/G                      | gAc/gGc             | rs50753342  | Tolerated               |
| <i>Dsm2</i>     | 7          | 36066391              | <i>Gpatch1</i>       | G/R                      | Gga/Aga             | rs108098034 | Affect protein function |
| <i>Dsm2</i>     | 7          | 35030779              | <i>4931406P16Rik</i> | R/K                      | aGg/aAg             | rs32485916  | Tolerated               |
| <i>Dsm2</i>     | 7          | 17676057              | <i>Psg16</i>         | F/Y                      | tTc/tAc             | rs31886178  | Tolerated               |
| <i>Dsm2</i>     | 7          | 46790123              | <i>Zfp619</i>        | R/H                      | cGc/cAc             | novel       | Tolerated               |
| <i>Dsm2</i>     | 7          | 24966120              | <i>Zfp114</i>        | A/S                      | Gca/Tca             | rs36363112  | Tolerated               |
| <i>Dsm2</i>     | 7          | 28695930              | <i>1700049G17Rik</i> | R/K                      | aGg/aAg             | rs45819068  | Tolerated               |
| <i>Dsm2</i>     | 7          | 17531368              | <i>Pnmal2</i>        | D/E                      | gaT/gaA             | novel       | nd                      |

| <b>Interval</b> | <b>Chr</b> | <b>Location (Mb)*</b> | <b>Gene</b>          | <b>Amino acid change</b> | <b>Codon change</b> | <b>RS #</b> | <b>SIFT<sup>†</sup></b> |
|-----------------|------------|-----------------------|----------------------|--------------------------|---------------------|-------------|-------------------------|
| <i>Dsm2</i>     | 7          | 39006421              | <i>Plekhf1</i>       | D/E                      | gaT/gaG             | novel       | Tolerated               |
| <i>Dsm2</i>     | 7          | 25088715              | <i>Zfp94</i>         | H/R                      | cAt/cGt             | rs8276480   | Affect protein function |
| <i>Dsm2</i>     | 7          | 25014557              | <i>Zfp109</i>        | C/R                      | Tgt/Cgt             | rs36812494  | Tolerated               |
| <i>Dsm2</i>     | 7          | 19577440              | <i>Gm10676</i>       | R/*                      | Cga/Tga             | rs31285526  | nd                      |
| <i>Dsm2</i>     | 7          | 19476694              | <i>Ccdc61</i>        | A/T                      | Gcc/Acc             | rs32198643  | Tolerated               |
| <i>Dsm2</i>     | 7          | 17470627              | <i>Dact3</i>         | V/I                      | Gta/Ata             | novel       | Tolerated               |
| <i>Dsm2</i>     | 7          | 24984009              | <i>Zfp111</i>        | S/T                      | Tca/Aca             | rs49700498  | Tolerated               |
| <i>Dsm2</i>     | 7          | 26014791              | <i>9130221H12Rik</i> | L/P                      | cTc/cCc             | rs31011588  | nd                      |
| <i>Dsm3</i>     | 8          | 54603183              | <i>Aga</i>           | H/N                      | Cac/Aac             | rs36265099  | Tolerated               |
| <i>Dsm3</i>     | 8          | 55750449              | <i>Wdr17</i>         | I/V                      | Atc/Gtc             | rs31343316  | Tolerated               |
| <i>Dsm3</i>     | 8          | 59017427              | <i>BC088983</i>      | D/E                      | gaT/gaG             | rs33607336  | Tolerated               |
| <i>Dsm3</i>     | 8          | 63485573              | <i>Nek1</i>          | R/S                      | agA/agT             | novel       | Affect protein function |
| <i>Dsm3</i>     | 8          | 63704973              | <i>Sh3rf1</i>        | G/V                      | gGc/gTc             | rs33135970  | Tolerated               |
| <i>Dsm3</i>     | 8          | 71331435              | <i>Ints10</i>        | N/T                      | aAc/aCc             | rs49601394  | Tolerated               |
| <i>Dsm3</i>     | 8          | 71423357              | <i>Lpl</i>           | D/N                      | Gat/Aat             | rs48623874  | Tolerated               |
| <i>Dsm3</i>     | 8          | 71664583              | <i>Lzts1</i>         | I/M                      | atA/atG             | rs46387265  | Tolerated               |
| <i>Dsm3</i>     | 8          | 71751909              | <i>Zfp930</i>        | K/T                      | aAa/aCa             | rs33356689  | Tolerated               |
| <i>Dsm3</i>     | 8          | 71896186              | <i>Gm10033</i>       | C/Y                      | tGt/tAt             | rs32839177  | nd                      |
| <i>Dsm3</i>     | 8          | 71897538              | <i>Gm10311</i>       | N/K                      | aaC/aaA             | rs33457667  | nd                      |
| <i>Dsm3</i>     | 8          | 72136271              | <i>Zfp868</i>        | S/N                      | aGt/aAt             | rs32562468  | tolerated               |
| <i>Dsm3</i>     | 8          | 72267147              | <i>Zfp963</i>        | S/N                      | aGt/aAt             | rs33361474  | Affect protein function |
| <i>Dsm3</i>     | 8          | 72340972              | <i>Gmip</i>          | A/V                      | gCa/gTa             | rs32798929  | Tolerated               |
| <i>Dsm3</i>     | 8          | 72356662              | <i>Pbx4</i>          | T/S                      | Acc/Tcc             | rs33520026  | Tolerated               |
| <i>Dsm3</i>     | 8          | 72414827              | <i>Yjefn3</i>        | R/C                      | Cgc/Tgc             | rs48997630  | Affect protein function |
| <i>Dsm3</i>     | 8          | 72588837              | <i>Sugp1</i>         | P/L                      | cCt/cTt             | rs13471212  | Tolerated               |
| <i>Dsm3</i>     | 8          | 72601385              | <i>Tm6sf2</i>        | R/Q                      | cGg/cAg             | rs33507109  | Tolerated               |
| <i>Dsm3</i>     | 8          | 72631376              | <i>Ncan</i>          | K/E                      | Aag/Gag             | rs32944017  | Tolerated               |
| <i>Dsm3</i>     | 8          | 72775709              | <i>Sugp2</i>         | I/L                      | Att/Ctt             | rs33248225  | Tolerated               |
| <i>Dsm3</i>     | 8          | 72816916              | <i>Homer3</i>        | S/A                      | Tcg/Gcg             | rs33368143  | Tolerated               |
| <i>Dsm3</i>     | 8          | 72839765              | <i>Lass1</i>         | A/T                      | Gct/Act             | rs32784207  | Tolerated               |
| <i>Dsm3</i>     | 8          | 72854735              | <i>Gdf1</i>          | S/C                      | Agt/Tgt             | rs32650885  | Affect protein function |
| <i>Dsm3</i>     | 8          | 73008269              | <i>Tmem59l</i>       | L/P                      | cTg/cCg             | rs32740361  | Tolerated               |
| <i>Dsm3</i>     | 8          | 73030450              | <i>2810428115Rik</i> | Q/R                      | cAg/cGg             | rs13466955  | Tolerated               |
| <i>Dsm3</i>     | 8          | 73043950              | <i>Kxd1</i>          | A/V                      | gCg/gTg             | rs32856081  | nd                      |
| <i>Dsm3</i>     | 8          | 73102993              | <i>Ell</i>           | Y/H                      | Tat/Cat             | rs3654030   | Tolerated               |
| <i>Dsm3</i>     | 8          | 73289000              | <i>Ifi30</i>         | A/V                      | gCc/gTc             | rs3689450   | Tolerated               |
| <i>Dsm3</i>     | 8          | 73294377              | <i>Pik3r2</i>        | I/V                      | Ata/Gta             | rs33473198  | Tolerated               |
| <i>Dsm3</i>     | 8          | 73361103              | <i>Arrdc2</i>        | R/H                      | cGc/cAc             | rs33374964  | Tolerated               |
| <i>Dsm3</i>     | 8          | 73392909              | <i>Ccdc124</i>       | A/V                      | gCc/gTc             | rs32705818  | Tolerated               |
| <i>Dsm3</i>     | 8          | 73407779              | <i>Slc5a5</i>        | A/V                      | gCt/gTt             | rs48608846  | Tolerated               |
| <i>Dsm3</i>     | 8          | 73437883              | <i>Mtap1s</i>        | Q/R                      | cAg/cGg             | rs32782663  | Tolerated               |
| <i>Dsm3</i>     | 8          | 73781317              | <i>Haus8</i>         | G/V                      | gGa/gTa             | rs49571184  | Tolerated               |

| <b>Interval</b> | <b>Chr</b> | <b>Location (Mb)*</b> | <b>Gene</b>          | <b>Amino acid change</b> | <b>Codon change</b> | <b>RS #</b> | <b>SIFT<sup>†</sup></b> |
|-----------------|------------|-----------------------|----------------------|--------------------------|---------------------|-------------|-------------------------|
| <i>Dsm3</i>     | 8          | 73862894              | <i>Myo9b</i>         | F/L                      | Ttc/Ctc             | rs3662998   | Tolerated               |
| <i>Dsm3</i>     | 8          | 73890964              | <i>Use1</i>          | N/S                      | aAc/aGc             | rs32955301  | Tolerated               |
| <i>Dsm3</i>     | 8          | 73895773              | <i>Ocel1</i>         | R/K                      | aGg/aAg             | rs33439200  | Tolerated               |
| <i>Dsm3</i>     | 8          | 73902408              | <i>Nr2f6</i>         | V/L                      | Gtg/Ctg             | rs16822094  | nd                      |
| <i>Dsm3</i>     | 8          | 73909639              | <i>Ushbp1</i>        | L/R                      | cTg/cGg             | rs48453311  | Tolerated               |
| <i>Dsm3</i>     | 8          | 73921694              | <i>Babam1</i>        | T/P                      | Acg/Ccg             | rs32947475  | Tolerated               |
| <i>Dsm3</i>     | 8          | 74109902              | <i>Slc27a1</i>       | V/L                      | Gta/Cta             | rs8262739   | Tolerated               |
| <i>Dsm3</i>     | 8          | 74122985              | <i>Fam129c</i>       | N/D                      | Aat/Gat             | rs32985468  | Tolerated               |
| <i>Dsm3</i>     | 8          | 74142112              | <i>Glt25d1</i>       | T/P                      | Aca/Cca             | rs32706986  | Tolerated               |
| <i>Dsm3</i>     | 8          | 74180183              | <i>Unc13a</i>        | D/E                      | gaT/gaG             | rs108187400 | Tolerated               |
| <i>Dsm3</i>     | 8          | 74211147              | <i>Jak3</i>          | S/R                      | Agc/Cgc             | rs33182445  | Tolerated               |
| <i>Dsm3</i>     | 8          | 74234961              | <i>Fcho1</i>         | A/T                      | Gcc/Acc             | rs33190926  | Tolerated               |
| <i>Dsm3</i>     | 8          | 74414221              | <i>Zfp709</i>        | L/F                      | Ctc/Ttc             | rs32828884  | Tolerated               |
| <i>Dsm3</i>     | 8          | 74433137              | <i>Zfp882</i>        | R/K                      | aGa/aAa             | rs50630300  | nd                      |
| <i>Dsm3</i>     | 8          | 74491837              | <i>Zfp961</i>        | S/R                      | agT/agG             | rs50965195  | Tolerated               |
| <i>Dsm3</i>     | 8          | 74869897              | <i>Eps15l1</i>       | T/A                      | Acc/Gcc             | rs49858650  | Tolerated               |
| <i>Dsm3</i>     | 8          | 74968867              | <i>1700030K09Rik</i> | S/I                      | aGt/aTt             | rs13479827  | Tolerated               |
| <i>Dsm3</i>     | 8          | 75008591              | <i>Slc35e1</i>       | T/I                      | aCc/aTc             | rs51818739  | Tolerated               |
| <i>Dsm3</i>     | 8          | 75109914              | <i>Tmem38a</i>       | G/S                      | Ggc/Agc             | rs13479828  | Tolerated               |
| <i>Dsm3</i>     | 8          | 75190542              | <i>Nwd1</i>          | S/N                      | aGc/aAc             | rs108371156 | Tolerated               |
| <i>Dsm3</i>     | 8          | 83508407              | <i>Usp38</i>         | A/V                      | gCc/gTc             | rs13461494  | Tolerated               |
| <i>Dsm3</i>     | 8          | 84368392              | <i>Inpp4b</i>        | L/P                      | cTg/cCg             | rs33412198  | nd                      |
| <i>Dsm3</i>     | 8          | 85388231              | <i>Rnf150</i>        | A/V                      | gCc/gTc             | rs37159290  | Tolerated               |
| <i>Dsm3</i>     | 8          | 85689731              | <i>Gm10645</i>       | P/R                      | cCg/cGg             | rs33302795  | nd                      |
| <i>Dsm3</i>     | 8          | 85773343              | <i>Tbc1d9</i>        | G/D                      | gGc/gAc             | rs46480564  | Tolerated               |
| <i>Dsm3</i>     | 8          | 85846636              | <i>Elmod2</i>        | Q/E                      | Cag/Gag             | rs48577786  | Tolerated               |
| <i>Dsm3</i>     | 8          | 85934426              | <i>Clgn</i>          | R/K                      | aGg/aAg             | rs16789437  | Tolerated               |
| <i>Dsm3</i>     | 8          | 85961937              | <i>Scoc</i>          | W/L                      | tGg/tTg             | rs51827371  | Tolerated               |
| <i>Dsm3</i>     | 8          | 86248243              | <i>Cd97</i>          | S/A                      | Tcc/Gcc             | rs13462843  | Tolerated               |
| <i>Dsm3</i>     | 8          | 86553434              | <i>Palm3</i>         | K/E                      | Aag/Gag             | rs32994613  | Tolerated               |
| <i>Dsm3</i>     | 8          | 86590245              | <i>C330011M18Rik</i> | L/M                      | Ttg/Atg             | rs33393338  | nd                      |
| <i>Dsm3</i>     | 8          | 86621618              | <i>Dcaf15</i>        | W/R                      | Tgg/Cgg             | rs47675262  | Affect protein function |
| <i>Dsm3</i>     | 8          | 86657762              | <i>Cc2d1a</i>        | P/S                      | Cct/Tct             | rs33569206  | Tolerated               |
| <i>Dsm3</i>     | 8          | 86691126              | <i>4930432K21Rik</i> | R/K                      | aGg/aAg             | rs37326990  | Tolerated               |
| <i>Dsm3</i>     | 8          | 86750600              | <i>Zswim4</i>        | S/N                      | aGc/aAc             | rs32556818  | Tolerated               |
| <i>Dsm3</i>     | 8          | 87186263              | <i>Ier2</i>          | G/S                      | Ggt/Agt             | rs32599097  | Tolerated               |
| <i>Dsm3</i>     | 8          | 87213684              | <i>Trmt1</i>         | S/F                      | tCc/tTc             | rs32652529  | Tolerated               |
| <i>Dsm3</i>     | 8          | 87226581              | <i>Lyl1</i>          | R/G                      | Aga/Gga             | rs13460901  | Tolerated               |
| <i>Dsm3</i>     | 8          | 87356244              | <i>Gadd45gip1</i>    | G/S                      | Ggt/Agt             | rs50271456  | Tolerated               |
| <i>Dsm3</i>     | 8          | 87391306              | <i>Farsa</i>         | G/D                      | gGc/gAc             | rs32856242  | Affect protein function |
| <i>Dsm3</i>     | 8          | 87416307              | <i>Gcdh</i>          | G/R                      | Gga/Cga             | rs33533940  | Tolerated               |
| <i>Dsm3</i>     | 8          | 87476618              | <i>Rtbdn</i>         | V/E                      | gTg/gAg             | rs45870120  | Tolerated               |

| <b>Interval</b> | <b>Chr</b> | <b>Location (Mb)*</b> | <b>Gene</b>          | <b>Amino acid change</b> | <b>Codon change</b> | <b>RS #</b> | <b>SIFT<sup>†</sup></b> |
|-----------------|------------|-----------------------|----------------------|--------------------------|---------------------|-------------|-------------------------|
| <i>Dsm3</i>     | 8          | 87515295              | <i>Hook2</i>         | N/D                      | Aac/Gac             | rs32768427  | Tolerated               |
| <i>Dsm3</i>     | 8          | 87584174              | <i>Fbxw9</i>         | S/T                      | Tcg/Acg             | rs51761769  | Tolerated               |
| <i>Dsm3</i>     | 8          | 87597303              | <i>Dhps</i>          | S/N                      | aGt/aAt             | rs32601271  | Tolerated               |
| <i>Dsm3</i>     | 8          | 87614821              | <i>Man2b1</i>        | V/A                      | gTa/gCa             | rs13466172  | Tolerated               |
| <i>Dsm3</i>     | 8          | 87633945              | <i>Zfp791</i>        | D/E                      | gaT/gaG             | rs33372801  | Tolerated               |
| <i>Dsm3</i>     | 8          | 87826731              | <i>Orc6</i>          | V/M                      | Gtg/Atg             | rs32970969  | Tolerated               |
| <i>Dsm3</i>     | 8          | 88077263              | <i>Dnaja2</i>        | K/R                      | aAg/aGg             | rs13469334  | Affect protein function |
| <i>Dsm3</i>     | 8          | 88250076              | <i>Ifg1</i>          | S/P                      | Tct/Cct             | rs13465531  | Tolerated               |
| <i>Dsm3</i>     | 8          | 90663819              | <i>Heatr3</i>        | V/I                      | Gtt/Att             | rs108308101 | Tolerated               |
| <i>Dsm3</i>     | 8          | 90833664              | <i>Adcy7</i>         | A/V                      | gCa/gTa             | rs13479889  | Tolerated               |
| <i>Dsm3</i>     | 8          | 91115953              | <i>Nkd1</i>          | V/M                      | Gtg/Atg             | rs33576350  | Tolerated               |
| <i>Dsm3</i>     | 8          | 91155703              | <i>Snx20</i>         | P/L                      | cCc/cTc             | rs49016988  | Tolerated               |
| <i>Dsm3</i>     | 8          | 91556211              | <i>Sall1</i>         | A/E                      | gCa/gAa             | rs33127605  | Tolerated               |
| <i>Dsm3</i>     | 8          | 93456791              | <i>Chd9</i>          | P/H                      | cCt/cAt             | rs33410126  | Tolerated               |
| <i>Dsm3</i>     | 8          | 93611040              | <i>Rbl2</i>          | R/T                      | aGa/aCa             | rs32687029  | Tolerated               |
| <i>Dsm3</i>     | 8          | 93636464              | <i>Aktip</i>         | F/S                      | tTc/tCc             | rs50604922  | nd                      |
| <i>Dsm3</i>     | 8          | 93784905              | <i>Rpgrip11</i>      | Y/H                      | Tac/Cac             | rs32896079  | Tolerated               |
| <i>Dsm3</i>     | 8          | 94009098              | <i>Fto</i>           | N/S                      | aAt/aGt             | rs32686383  | Tolerated               |
| <i>Dsm3</i>     | 8          | 94322863              | <i>Irx3</i>          | I/T                      | aTc/aCc             | rs13479918  | Affect protein function |
| <i>Dsm3</i>     | 8          | 95379499              | <i>Lpcat2</i>        | T/R                      | aCg/aGg             | rs50123544  | Tolerated               |
| <i>Dsm3</i>     | 8          | 96582159              | <i>Ogfod1</i>        | R/Q                      | cGa/cAa             | rs32059856  | Tolerated               |
| <i>Dsm3</i>     | 8          | 97147084              | <i>Rspry1</i>        | T/A                      | Aca/Gca             | rs32107374  | Tolerated               |
| <i>Dsm3</i>     | 8          | 97653100              | <i>Kifc3</i>         | N/K                      | aaT/aaA             | rs36764080  | Tolerated               |
| <i>Dsm3</i>     | 8          | 97847605              | <i>Zfp319</i>        | V/I                      | Gtt/Att             | rs32889436  | nd                      |
| <i>Dsm3</i>     | 8          | 97869204              | <i>AA960436</i>      | V/I                      | Gtc/Atc             | rs32783874  | Tolerated               |
| <i>Dsm3</i>     | 8          | 105174527             | <i>Cdh11</i>         | E/D                      | gaA/gaT             | rs33464298  | Tolerated               |
| <i>Dsm3</i>     | 8          | 109572797             | <i>Cog8</i>          | M/V                      | Atg/Gtg             | rs4227359   | Tolerated               |
| <i>Dsm3</i>     | 8          | 109600574             | <i>Terf2</i>         | K/E                      | Aag/Gag             | rs47210744  | Tolerated               |
| <i>Dsm3</i>     | 8          | 111774838             | <i>4922502B01Rik</i> | N/K                      | aaT/aaA             | rs33402085  | nd                      |
| <i>Dsm5</i>     | 11         | 7050842               | <i>Adcy1</i>         | T/M                      | aCg/aTg             | rs26913279  | Tolerated               |
| <i>Dsm5</i>     | 11         | 8378426               | <i>Tns3</i>          | S/A                      | Tca/Gca             | rs13480859  | Tolerated               |
| <i>Dsm5</i>     | 11         | 12153991              | <i>Cobl</i>          | H/Y                      | Cac/Tac             | rs29456637  | Affect protein function |
| <i>Dsm5</i>     | 11         | 17846044              | <i>Etaal</i>         | G/D                      | gGc/gAc             | rs29422803  | Tolerated               |
| <i>Dsm5</i>     | 11         | 21621166              | <i>Wdpcp</i>         | S/N                      | aGt/aAt             | rs13480905  | Tolerated               |
| <i>Dsm5</i>     | 11         | 21956910              | <i>Ehbp1</i>         | D/E                      | gaT/gaG             | rs26866453  | Tolerated               |
| <i>Dsm5</i>     | 11         | 42128461              | <i>Gabra6</i>        | Q/E                      | Caa/Gaa             | rs50667464  | Tolerated               |
| <i>Dsm5</i>     | 11         | 54754327              | <i>Tnip1</i>         | G/R                      | Ggg/Cgg             | rs51531280  | Tolerated               |
| <i>Dsm5</i>     | 11         | 54796819              | <i>Anxa6</i>         | K/I                      | aAa/aTa             | rs13466153  | Tolerated               |
| <i>Dsm5</i>     | 11         | 55076001              | <i>Fat2</i>          | P/L                      | cCg/cTg             | novel       | Tolerated               |

\*GRC m38 assembly; nd=not determined

<sup>†</sup>SIFT <<http://sift.bii.a-star.edu.sg/>>; Kumar P, Henikoff S, Ng PC (2009) Predicting the effects of coding non-synonymous variants on protein function using the SIFT algorithm. Nat Protoc 4, 1073-1081.
